1 **Spatially mapped single-cell chromatin accessibility**

2

3 Casey A. Thornton<sup>1</sup>, Ryan M. Mulqueen<sup>1</sup>, Andrew Nishida<sup>1</sup>, Kristof A. Torkenczy<sup>1</sup>, Eve G. Lowenstein<sup>1</sup>,  
4 Andrew J. Fields<sup>1</sup>, Frank J. Steemers<sup>2</sup>, Wenri Zhang<sup>3</sup>, Heather L. McConnell<sup>4</sup>, Randy L. Woltjer<sup>5</sup>, Anusha  
5 Mishra<sup>4,6</sup>, Kevin M. Wright<sup>7</sup>, Andrew C. Adey<sup>1,6,8,9,\*</sup>

6

7 1) Molecular and Medical Genetics, Oregon Health & Science University, Portland, OR.

8 2) Illumina Inc. San Diego, CA

9 3) Anesthesiology and Peri-Operative Medicine, Oregon Health & Science University, Portland, OR.

10 4) Jungers Center for Neurosciences Research, Department of Neurology, Oregon Health & Science  
11 University, Portland, OR.

12 5) Department of Pathology, Oregon Health & Science University, Portland, OR.

13 6) Knight Cardiovascular Institute, Oregon Health & Science University, Portland, OR.

14 7) The Vollum Institute, Oregon Health & Science University, Portland, OR.

15 8) CEDAR, Oregon Health & Science University, Portland, OR.

16 9) Knight Cancer Institute, Oregon Health & Science University, Portland, OR.

17 \* To whom correspondence should be addressed: [adey@ohsu.edu](mailto:adey@ohsu.edu)

18

19 **Abstract**

20 High-throughput single-cell epigenomic assays can resolve the heterogeneity of cell types and states in  
21 complex tissues, however, spatial orientation within the network of interconnected cells is lost. Here, we  
22 present a novel method for highly scalable, spatially resolved, single-cell profiling of chromatin states. We  
23 use high-density multiregional sampling to perform single-cell combinatorial indexing on Microbiopsies  
24 Assigned to Positions for the Assay for Transposase Accessible Chromatin (sciMAP-ATAC) to produce  
25 single-cell data of an equivalent quality to non-spatially resolved single-cell ATAC-seq, where each cell is  
26 localized to a three-dimensional position within the tissue. A typical experiment comprises between 96 and  
27 384 spatially mapped tissue positions, each producing 10s to over 100 individual single-cell ATAC-seq  
28 profiles, and a typical resolution of 214 cubic microns; with the ability to tune the resolution and cell  
29 throughput to suit each target application. We apply sciMAP-ATAC to the adult mouse primary  
30 somatosensory cortex, where we profile cortical lamination and demonstrate the ability to analyze data  
31 from a single tissue position or compare a single cell type in adjacent positions. We also profile the human  
32 primary visual cortex, where we produce spatial trajectories through the cortex. Finally, we characterize the  
33 spatially progressive nature of cerebral ischemic infarct in the mouse brain using a model of transient  
34 middle cerebral artery occlusion. We leverage the spatial information to identify novel and known  
35 transcription factor activities that vary by proximity to the ischemic infarction core with cell type specificity.

## 36 Introduction

37 Heterogeneous cell types coordinate in complex networks to generate emergent properties of tissues.  
38 These cell types are not evenly dispersed across tissues, allowing for spatially localized functionality of  
39 organs. In many disease states, this becomes more apparent, as the affected organ experiences spatially  
40 progressive etiologies. For example, in the case of cerebral ischemia, loss of blood flow due to a blocked  
41 artery or blood vessel causes local cell death or infarction. Following ischemic injury, astrocytes and  
42 microglia enter reactive states with novel functions that are metered by proximity to the site of infarction<sup>1</sup>,  
43 but this spatial information has, so far, been difficult to assess. With the advent of massively parallel  
44 sequencing, many methods have emerged that characterize the molecular profiles of cells in unperturbed  
45 and perturbed systems by sequencing transcriptomic, genomic, and epigenomic cellular content. Single-  
46 cell technologies have further advanced these efforts by enabling the isolation of signals from individual  
47 cells within a sample, thus resolving the heterogeneity of complex tissues. Applications of single-cell  
48 technologies have identified novel cell types with characteristic -omic signatures in the highly complex  
49 tissue of the brain<sup>2,3</sup>. In the cerebral cortex, specifically, cells form an intricate layered hierarchical structure  
50 comprised of both neuronal and glial cell types that generate sensory, motor and associational percepts<sup>4</sup>.  
51 While single-cell technologies have revolutionized cellular taxonomy and quantification of tissue  
52 heterogeneity, the spatial localization of single cells goes unrecorded because of whole-sample  
53 dissociation. Layer-specific gene expression profiles of cortical neurons and astrocytes have been  
54 characterized by spatial transcriptomic approaches and immunohistochemical (IHC) staining; however,  
55 spatially mapped epigenetic states of cortical cells have yet to be directly assayed, without relying on data  
56 integration<sup>5-7</sup>.

57 To address this challenge, several strategies have emerged to assay transcription either directly *in situ* or  
58 in a regional manner. The former techniques utilize fluorescence *in situ* hybridization (FISH)<sup>8-10</sup> or *in situ*  
59 RNA-sequencing<sup>11,12</sup>. While powerful, FISH methods require the use of a defined probe set and are limited  
60 to the identification of DNA and RNA sequences. In contrast, technologies that utilize array-based mRNA  
61 barcoding do not require a defined set of genes and operate similarly to single-cell RNA-seq methods<sup>13,14</sup>,  
62 thus allowing for whole transcriptome profiling. Initial iterations of these platforms capture regional  
63 transcription over multiple cells; however, higher resolution variants may facilitate single-cell resolution.  
64 Unfortunately, these platforms rely on the relatively easy access to mRNA molecules that can be released  
65 from the cytoplasm and hybridized to barcoding probes, making the expansion into nuclear epigenetic  
66 properties challenging. It is for this reason that none of the current barcode array technologies have yet  
67 expanded into the chromatin accessibility space. With the wealth of epigenetic information that resides in  
68 the nucleus and the value it can add to characterizing complex biological systems<sup>15-17</sup>, we sought to  
69 address this challenge by harnessing the inherent throughput characteristics of single-cell combinatorial  
70 indexing assays<sup>18,19</sup>.

71 Here, we present single-cell combinatorial indexing from Microbiopsies with Assigned Positions for the  
72 Assay for Transposase Accessible Chromatin (sciMAP-ATAC). sciMAP-ATAC preserves cellular  
73 localization within intact tissues and generates thousands of spatially resolved high quality single-cell  
74 ATAC-seq libraries. As with other ‘sci-’ technologies, sciMAP-ATAC does not require specialized  
75 equipment and scales nonlinearly, enabling high throughput potential. Building upon multiregional sampling  
76 strategies<sup>20,21</sup>, where several regions are isolated, we reasoned that the sample multiplexing capabilities of  
77 combinatorial indexing could be utilized to perform high throughput multiregional sampling at resolutions  
78 approaching those of array-based spatial transcriptional profiling, all while retaining true single-cell profiles.  
79 Unlike multiregional sampling, we perform high-density microbiopsy sampling, ranging from 100-500  $\mu\text{m}$  in  
80 diameter, on cryosectioned tissue sections, between 100-300  $\mu\text{m}$  in thickness, to produce up to hundreds  
81 of spatially mapped punches of tissue, each producing a set of single-cell chromatin accessibility profiles  
82 (Figure 1a). We demonstrate the utility of sciMAP-ATAC by profiling the murine and human cortex, where  
83 distinct cell type compositions and chromatin profiles are observed based on the spatial orientation of the  
84 punches, and further extend the platform to characterize cerebral ischemic injury in a mouse model system  
85 where cell type compositions and epigenetic states are metered by proximity to the injury site (Extended  
86 Data Figure 1).

## 87 **Results**

### 88 **Single-cell combinatorial indexed ATAC-seq from microbiopsy punches**

89 Single-cell ATAC-seq requires the isolation and processing of nuclei such that the nuclear scaffold remains  
90 intact to facilitate library preparation via transposition *in situ*; it also requires that the chromatin structure is  
91 maintained to produce a chromatin accessibility signal. We and others have explored methods for tissue  
92 preservation that are compatible with single-cell ATAC-seq<sup>18,22</sup>, however, we sought to confirm that these  
93 strategies are compatible with freezing techniques used for cryosectioning and immunohistochemical (IHC)  
94 staining of tissue. We tested our workflow on mouse whole brain samples by processing one hemisphere  
95 using flash-freezing methods designed for tissue freezing medium (TFM) embedding and cryosectioning  
96 (Methods) and processing the paired hemisphere as fresh tissue. Our previously established non-spatially  
97 resolved sci-ATAC-seq workflow<sup>22</sup> was performed on both hemispheres, including pooling post-  
98 transposition for sorting, PCR amplification, and sequencing. Flash-frozen and fresh nuclei produced nearly  
99 identical passing reads per cell at the depth they were sequenced, along with comparable fractions of  
100 reads present in a set of aggregate mouse ATAC-seq peaks (FRiS; 0.93 and 0.91 for fresh and frozen,  
101 respectively; Extended Data Figure 2a and 2b).

102 We then explored techniques for cryosectioning flash-frozen TFM-embedded tissue at thicknesses  
103 compatible with microbiopsy punching. Typically, cryosectioning is used to produce sections for imaging

104 applications, and thicker sectioning results in tissue fracture. Drawing on past literature<sup>23</sup>, we carried out a  
105 series of experiments testing several sectioning thicknesses and punch diameters followed by nuclei  
106 isolation and debris-cleanup on flash-frozen, embedded mouse brain microbiopsy punches. We found that  
107 holding cryo-chamber and chuck temperatures at -11°C improves flexibility of the fragile fresh-frozen tissue  
108 while maintaining adherence of embedded tissue to the sample mount, thus allowing for uninterrupted  
109 sectioning of alternating 100-300 µm sections for punching, and paired 20 µm sections for histology (Figure  
110 1a). This approach facilitates acquisition of both sections for microbiopsy punching and paired sections  
111 compatible with IHC staining and high-resolution microscopy. Cryopreservation of 100-300 µm/20 µm slide  
112 decks at -80°C allows for long-term sample storage and the ability to test hypotheses by staining after  
113 analysis of the spatially resolved chromatin accessibility profiles; however, we note that sections stored for  
114 ~3 months result in an overall loss of quality in transcription start site (TSS) enrichment.

115 Microbiopsy punching of 100-300 µm sections performed within a cooled chamber (Methods) allows for  
116 isolation of microscopic pellets of nuclei that readily dissociate in nuclear isolation buffer after mechanical  
117 dissociation by trituration. We observed minimal loss after pelleting and washing nuclei, an important step  
118 for the removal of mitochondria, which can deplete the available pool of transposase because of the high  
119 transposition efficiency into mitochondrial DNA<sup>24</sup>. Nuclei isolation, as measured by nuclei per cubic micron,  
120 was more efficient for volumetrically smaller punches (Figure 1b). This implies that smaller punches  
121 dissociate more readily because of a higher surface area to volume ratio, thus higher resolution punches  
122 yield more nuclei, respective of volume.

123 Next, we applied these techniques to perform sciMAP-ATAC, where we tested four methods of punch  
124 dissociation (Methods). We utilized a workflow similar to our established sci-ATAC-seq method, with each  
125 indexed transposition reaction performed on an individual punch, for a total of 384 transposition reactions,  
126 performed in four 96 well plates. Reactions were pooled and indexed nuclei were distributed via  
127 Fluorescence Assisted Nuclei Sorting (FANS) to wells of 4 new 96-well plates for indexed real-time PCR,  
128 followed by pooling and sequencing. The resulting library produced 8,011 cells passing filters, for an  
129 estimated doublet rate of 2.5% based on the total indexing space of 384 × 384 (Methods), and a mean of  
130 12,052 passing reads per cell (unique reads, aligned to autosomes or X chromosome at q10 or higher;  
131 Extended Data Figure 2a) at the depth sequenced and potential to reach 23,830 mean passing reads per  
132 cell with additional sequencing (Methods). This is comparable to the mean passing reads per cell from the  
133 whole brain sci-ATAC-seq library at 11,987 (projected mean passing reads of 24,672 and 32,029 for fresh  
134 and frozen preparations, respectively; Figure 1c, Extended Data Figure 2a). We observed a mean of 112  
135 passing cells per punch. This could be increased if additional PCR plates were sorted, as the pool of  
136 indexed nuclei were not depleted during FANS. A comparison between the four dissociation methods  
137 enabled us to identify an optimal means of punch processing that produced the highest cell counts per  
138 punch with high-quality cell profiles (Methods; Extended Data Figures 1b and 2a), which was used for all

139 subsequent experiments. Across all sciMAP-ATAC datasets produced in this study on healthy mouse brain  
140 tissue, we achieve a TSS enrichment of 14.73, within the ‘acceptable range’ prescribed by ENCODE (10-  
141 15, mm10 RefSeq annotation) and just shy of ‘ideal’ (>15). This is substantially below that of our sci-ATAC-  
142 seq preparation, with a TSS enrichment of 31.25; however, we note that an enrichment of more than  
143 double the ‘ideal’ standard is exceptionally high (Methods, Figure 1d). In line with the lower TSS  
144 enrichment in sci-MAP-ATAC, we also observed a reduction in the fraction of reads present in a mouse  
145 reference peak set (FRiS; Methods), with a mean ranging from 0.83 to 0.87, compared to 0.91 and 0.93 for  
146 sci-ATAC-seq (Extended Data Figure 2b). Finally, we performed an integrated analysis across these  
147 preparations that revealed negligible batch effects (Figure 1e, Extended Data Figures 3a and 3b). We  
148 observed a single exception in the form of a population of cells present only in the non-spatial dataset  
149 which, upon inspection, were determined to be spinal cord derived interneurons (Extended Data Figure 3c  
150 and 3d) and not present in coronal sections that were used in spatial experiments. Taken together, with  
151 improvements and validation on sample preparation, cryosectioning, nuclei isolation and the general sci-  
152 ATAC-seq protocol, we generated a robust method to obtain spatial information that we sought to test in a  
153 complex system.

#### 154 **sciMAP-ATAC in the adult mouse somatosensory cortex**

155 To establish the ability of sciMAP-ATAC to characterize single cells within a spatially organized tissue, we  
156 applied the technique to resolve murine cortical lamination within the primary somatosensory cortex (SSp).  
157 We harvested intact whole brain tissue from three wild-type C57/Bl6J adult male mice, flash-froze the  
158 tissue, and prepared whole brain slide decks of 200  $\mu\text{m}$  microbiopsy slides each interspersed with three 20  
159  $\mu\text{m}$  histological slides. To orient sections to intact mouse brain, and to establish the quality of histological  
160 section prepared according to the sciMAP-ATAC protocol, we stained nuclei using DAPI and  
161 immunohistochemically stained for *Satb2* to resolve cortical layers (Methods, Figure 2a). DAPI imaging  
162 was then matched to the adult mouse Allen Brain Reference Atlas<sup>25</sup>, which enabled determination of the  
163 SSp location within adjacent sections for punch acquisition. *Satb2* imaging demonstrated the quality of  
164 histological sections, across diverse fixation protocols (4% PFA post-fixation for 10 minutes and 70%  
165 ethanol post-fixation for 30 seconds) and generated a high signal-to-noise ratio canonical for *Satb2* IHC  
166 staining<sup>26</sup> (Figure 2b). Microbiopsy punches were then taken from three regions: i) outer (L2-4) SSp cortical  
167 layers, ii) inner (L5,6) SSp cortical layers and iii) throughout the striatum. The striatum is rich in glia and is  
168 absent of cortical glutamatergic neurons and cortical lamination. Therefore, the striatum punches served as  
169 a negative control for these features and also bolstered single-cell glial cell type identification. In total, 96  
170 individual tissue punches were obtained, split evenly between the three categories over eight coronal  
171 sections spanning the SSp (Figure 2a). After nuclei isolation, each well of the plate containing a single  
172 punch was split across four total 96-well plates for subsequent indexed transposition, providing four  
173 tagmentation technical replicates for each punch. Post-transposition, nuclei were pooled and distributed to

174 two 96-well PCR plates for the second tier of indexing and then sequenced using previously described  
175 protocols<sup>22</sup>.

176 We processed the raw sequence data as previously described<sup>22</sup>, which resulted in 7,779 cells passing  
177 quality filters (estimated doublet rate of 4.9%; Methods). Our mean passing reads per cell was 17,388, with  
178 a projected total passing mean reads per cell of 37,079 (Methods) and a TSS enrichment ranging from  
179 13.74 to 15.26 (Extended Data Figures 2a and 2c). A median of 81 single-cell profiles was obtained per  
180 punch, with little bias for punch target region or section (Extended Data Figure 2c). Subsequent peak  
181 calling, topic modeling, and dimensionality reduction (Methods) revealed cell groupings that were either  
182 mixed between the three regional categories or highly enriched for cells derived from the cortex, which was  
183 further divided by outer versus inner punch location (Figure 2c, Extended Data Figures 3e and 3f;  
184 Extended Data File 2). Overlay of spatial data on the UMAP projection fits with our expectation that  
185 glutamatergic (excitatory) neurons are cortex exclusive, displaying an absence of punch-to-punch crosstalk  
186 or contamination. Additionally, these cells were integrated with prior sciMAP-ATAC, and sci-ATAC-seq  
187 experiments where excitatory neuron clusters were also dominated by cortex-derived punches, with a  
188 shared spatial bias between upper and lower punch positions. This demonstrates that spatial datasets can  
189 be integrated with non-spatial datasets to provide additional spatial information to those datasets using  
190 label transfer or other analysis techniques (Extended Data Figures 3a and 3b).

191 We performed graph-based clustering to produce eleven clusters over eight broad cell type groups  
192 corresponding to glutamatergic neurons, GABAergic (inhibitory) neurons, GABAergic medium spiny  
193 neurons (MSNs; also referred to as spiny projection neurons), oligodendrocyte precursor cells (OPCs),  
194 newly formed oligodendrocytes, mature oligodendrocytes, astrocytes, microglia, and endothelial cells  
195 based on the chromatin accessibility signature of regulatory elements proximal to marker genes (Methods;  
196 Figures 2d and 2e; Extended Data File 1). GABAergic neurons co-cluster independent of punch location.  
197 Instead, these neurons subdivide into non-layer-specific cell sub-types in the cortex and striatum. However,  
198 glutamatergic neurons separate along the dorsal-ventral axis. This recapitulates known neuronal cell state  
199 biology, where glutamatergic pyramidal neurons express cortical layer(s) specific markers that define the  
200 spatially defined cortical layers. Within the SSp derived cells, we observed 66.6, 62.4, and 49.9 percent of  
201 cells corresponding to neurons in the inner cortex, outer cortex, and striatum, respectively. These equate to  
202 glia to neuron ratios (GNRs) of 0.50, 0.60, and 1.00 from inner cortex, outer cortex, and striatum,  
203 respectively, which correspond to previously reported mouse cerebral cortex and striatum GNRs of 0.66  
204 and 0.97, respectively<sup>27</sup>. In addition to coarse cell type characterization across the major punch categories,  
205 we also determined cell type composition for each individual spatially resolved punch (Figure 2g). For  
206 cortical punches, little variance was observed within the outer and inner punch categories; however, we did  
207 observe increased variability in the proportion of MSNs in the striatum punches, ranging between 2.78 and

208 72.64 percent, suggesting a non-even distribution of these cells, which is confirmed by MSN cell-type  
209 marker, DRD1, IHC staining in adult C57BL/6j striatum (Allen Mouse Brain Atlas).

210 We next characterized the single-cell ATAC profiles produced from a single tissue punch. We isolated cell  
211 profiles that were from punch F5 (n=90 cells), an inner cortex punch, and performed the same analysis as  
212 above using the set of peaks called on the full dataset. This produced a set of topic weights that contained  
213 a clear structure and were associated with specific cell types (Figure 2h). This was also clear in the UMAP  
214 projection, with three primary clusters of cells identified (Figure 2i, Extended Data Figure 3g). Each of these  
215 groups was dominated by one cell type, including glutamatergic neurons and GABAergic neurons, with the  
216 third group comprised predominantly of glial cell types. We then took the examination of this individual  
217 punch further by performing all aspects of the analysis, including peak calling, on only the cell profiles  
218 present in punch F5. From those 90 cells, we were able to call 8,460 peaks which were sufficient to  
219 perform topic modeling and UMAP visualization, and identify two distinct clusters: one comprised of  
220 glutamatergic neurons, and the second containing all other cell types, based on the cell type identities  
221 established in the analysis of the full dataset (Extended Data Figures 3h and 3i). A comparison of global  
222 motif enrichment between the two clusters revealed elevated Neurod6 and Tbr1 and depleted Sox9 motif  
223 accessibility in the cluster comprised of glutamatergic neurons, suggesting very coarse cell type class  
224 assignment can be performed on data from a single punch analyzed in isolation (Extended Data Figure 3j).  
225 Further resolution of cell types on such a small number of cells, especially without leveraging larger peak  
226 sets, is not likely feasible simply due to the low abundance of certain cell types - for example, there was  
227 only one endothelial cell present in punch F5. However, it is unlikely that individual punches would be  
228 profiled alone in an experiment and the throughput provided in sciMAP-ATAC enables identification of low-  
229 abundance cell types in the aggregate dataset, which can be used when performing analysis on individual  
230 punch positions.

231 Finally, we explored whether we could identify and characterize spatially distinct chromatin properties from  
232 a single cell type present within two adjacent punches. We isolated cells that were identified as  
233 glutamatergic neurons in two punches, C5 (inner cortex) and B5 (outer cortex), that were immediately  
234 adjacent with 83 and 65 total cells, and 42 and 35 glutamatergic cells, respectively. Similar to the single  
235 punch analysis, we produced a counts matrix including only these cells and used the full set of peaks to  
236 perform topic analysis and visualization using UMAP, which showed clear separation between the two  
237 locations (Figure 2j). We then assessed global motif accessibility, which revealed clear enrichment for  
238 motifs associated with upper or lower cortical layers, including RORB, enriched in the outer cortex, and  
239 TBR1, enriched in the inner cortex (Figure 2k).

240 **Spatial trajectories of single-cell ATAC-seq in the human cortex**

241 With the ability to probe spatial single-cell chromatin accessibility established in the mouse cortical  
242 lamination experiment, we next deployed sciMAP-ATAC on human brain tissue to profile lamination in the  
243 adult primary visual cortex (VISp) using an equivalent resolution of 215 cubic microns. Samples of human  
244 VISp tissue were obtained from an adult (60 yr., male) with no known neurodegenerative disorders at 5.5  
245 hours postmortem. Samples were oriented and flash frozen in TFM prior to storage at -80°C. The sample  
246 was cryosectioned using the same alternating thick (200  $\mu\text{m}$ ) and thin (20  $\mu\text{m}$ ) pattern as previously  
247 described. We designed and implemented a 250  $\mu\text{m}$  diameter punch schematic across three adjacent 200  
248  $\mu\text{m}$  sections to produce twenty-one distinct trajectories comprised of eight punches spanning the cortex,  
249 with an additional twenty punches distributed in the subcortical white matter for a total of 188 spatially  
250 mapped tissue punches (Figure 3a). In total, 4,547 cells passed quality filters with a mean of 30,212 reads  
251 per cell (estimated mean of 98,274 passing reads per cell with additional sequencing; Methods, Extended  
252 Data Figures 2a and 4a), a mean TSS enrichment of 15.80 – more than twice the ‘ideal’ ENCODE standard  
253 for bulk ATAC-seq datasets (>7, GRCh38 RefSeq annotation), and a FRiS of 0.45 using a human  
254 reference dataset<sup>28</sup> (Methods, Extended Data Figures 2b and 2d).

255 Cell profiles were generated as described in prior experiments, which resulted in six distinct clusters  
256 representing the major cell types. Similar to the murine cortex, glutamatergic neurons exhibited the most  
257 distinct spatial patterning with a clear gradient spanning cortical trajectories (Figures 3b-3d). Each of the 21  
258 individual trajectories through the cortex produced similar distributions of cells through UMAP projections  
259 with a lack of glutamatergic neurons present in the punches obtained from subcortical white matter  
260 (Extended Data File 2). Average cell type composition along these trajectories revealed the expected  
261 pattern of an increased proportion of oligodendrocytes and decreased glutamatergic neuron abundance as  
262 the trajectory approached or entered the subcortical white matter region (Figure 3e). Individual punches  
263 largely matched the corresponding average position profile (1-8, WM), with higher variability at the first  
264 punch where some trajectories overlapped the pial surface of the cortex (Figure 3f). Using our cell type  
265 assignments, we next isolated glutamatergic neurons and split them by position along their respective  
266 trajectories. We examined ATAC signal at layer-specific marker genes broken down by each spatially  
267 distinct category, which revealed increased accessibility at genes associated with outer cortical layers  
268 within the outer cortical punches and vice versa (Figure 3g).

269 We next selected all cells from the centermost trajectory of section 1 (T1.4, n=358 cells) and performed an  
270 isolated analysis using peaks called on the full dataset for topic analysis, cluster identification, and  
271 visualization with UMAP (Extended Data Figures 4b-4e). Clear separation was observed between major  
272 cell types across six clusters, with two distinct clusters of oligodendrocytes, two clusters of glutamatergic  
273 neurons, one cluster comprised of GABAergic neurons, and finally, a cluster made up of all other cell types  
274 (astrocytes, endothelial and OPCs). When performing the analysis in isolation using only T1.4 cells for  
275 peak calling, we identified 16,493 peaks that were used for subsequent analysis to produce four clusters



276 with notably less cell type separation than when leveraging the set of peaks from the full dataset (Extended  
277 Data Figure 4f-4g). The first cluster was comprised of both glutamatergic and GABAergic neurons, the  
278 second was primarily oligodendrocytes, the third included oligodendrocytes as well as the majority of cells  
279 from all other non-neuronal cell types, with the fourth cluster comprised of only a handful of cells with no  
280 dominant cell type. In line with the previous assessment of a single punch from the mouse SSp, cell type  
281 separation can be distinct for major cell types when leveraging larger peak sets than the limited number  
282 that can be called on small cell count datasets. This supports the assertion that computational  
283 improvements to enable peak calling on low cell count datasets can substantially boost analytical power<sup>29</sup>.

284 Finally, we isolated only cells determined to be glutamatergic neurons based on the full dataset cell type  
285 assignment within Trajectory 1.4 (n=121 cells). We assessed these cells again using the full peak set  
286 through the same analysis workflow as previously described. As in the UMAP projections on cells from the  
287 full experiment, these cells were positioned along a gradient that reflected their position along the trajectory  
288 (Figure 3h). We then assessed the global accessibility of DNA binding motifs that captured spatially distinct  
289 enrichments through the trajectory reflecting the expected pattern of transcription factor activities through  
290 cortical layers (Figure 3i). This included enrichment for FOS motif accessibility in the outer cortical layers,  
291 slightly increased accessibility for NEUROD6 toward the inner cortex, and increased accessibility for RORB  
292 motifs in punches 4-6 along the trajectory, corresponding to canonical cortical layer 4 RORB expression.  
293 Taken together, sciMAP-ATAC is capable of producing high-quality single-cell ATAC-seq profiles from  
294 postmortem human tissue with a spatial resolution capable of identifying the major components of cortical  
295 lamination, with the capability to characterize a single spatial trajectory through the cortex.

## 296 **sciMAP-ATAC in cerebral ischemia reveals spatially progressive chromatin features**

297 Beyond the characterization of architecture in structured organs, spatially resolved techniques are  
298 particularly well-suited to investigate injury or disease pathology that includes a spatially graded response.  
299 Cerebral ischemia produces a complex spatially progressive phenotype with extensive tissue alterations  
300 and shifts in cell type abundance and epigenetic states<sup>30-35</sup>. Cerebral ischemic infarction, or cell death as a  
301 result of impaired blood flow in the brain, is followed by gliosis, a process in which glia in the surrounding  
302 tissue enter reactive states that are potentially aimed at restoring tissue homeostasis, but can involve the  
303 loss of normal function (or adopt of damaging function) and form a glial scar. Many components involved in  
304 the ischemic cascade are well studied, including factors that promote post-ischemic inflammation (e.g.  
305 IRF1, NF-kB, ATF2, STAT3, EGR1, and CEBPB) and prevent post-ischemic inflammation and neuronal  
306 damage (e.g. HIF-1, CREB, C-FOS, PPAR $\alpha$ , PPAR $\gamma$ , and P53)<sup>36</sup>. Reactive gliosis can be characterized by  
307 increased *Gfap* expression in astrocytes and increased *Iba1* in microglia. Myelination depletion is a  
308 hallmark of cerebral ischemic injury, due to acute oligodendrocyte cell death and impaired OPC  
309 differentiation<sup>37,38</sup>. Far less is known, however, about glial cell state transitions in the area surrounding focal

310 ischemic infarction in the brain. We reasoned that our sciMAP-ATAC technology could reveal, with cell type  
311 and spatial specificity, the epigenetic alterations that occur to accompany and/or drive the ischemic  
312 cascade and post-ischemic pathology.

313 To accomplish this, we used a transient middle cerebral artery occlusion (MCAO) mouse model of ischemic  
314 injury with reperfusion (Figure 4a). Each ischemic (n=2 animals) and naïve (n=3) brain was flash frozen 3  
315 days after surgery, embedded in TFM, sectioned, alternating between 200  $\mu\text{m}$  for sciMAP-ATAC and 20  
316  $\mu\text{m}$  for IHC for IBA1 (microglia), GFAP (astrocytes, Figure 4b), and counterstained using DAPI. We used  
317 these images to define the infarct area by lack of autofluorescence and absence of GFAP-positive  
318 astrocytes while being surrounded by reactive astrocytes exhibiting increased GFAP signal at the infarct  
319 border (Extended Data Figure 5a). We next defined two axes for targeting the sciMAP-ATAC punches, the  
320 first progressing from the pial surface of the cortex to the striatum, all within the infarct core (punch position  
321 axis 1-4), and the second progressing from the infarct core toward the infarct border (punch position axis 5-  
322 8). GFAP staining intensity as measured by IHC was absent in the infarct core (punch positions 5-7) but  
323 increased at the infarct border in punch position 8, recapitulating known features of glial scar formation  
324 surrounding the infarct area. We then performed sciMAP-ATAC on the 200  $\mu\text{m}$  sections along each axis to  
325 produce 5,081 cells with a mean passing reads per cell of 33,832 (estimated mean passing reads per cell  
326 of 225,670 with further sequencing) and a mean of 26.6 high-quality cell profiles per punch (Extended Data  
327 Figures 2a, 2e, and 5b). TSS enrichment for this preparation was notably lower than previous preparations  
328 ranging from 5.05 (stroke hemisphere) to 7.50 (naïve brain), which we suspect is due to several factors  
329 (Extended Data Figure 2e). The first is that the stroke hemisphere contained many dead or dying cells that  
330 exhibit reduced ATAC signal, which we describe in more detail below, and the second is that these  
331 sections were stored for >3 months prior to sciMAP-ATAC processing, suggesting that long-term storage of  
332 sections may result in a reduction in data quality. Despite the reduced TSS enrichment and comparably  
333 lower FRiS (0.79-0.82; Extended Data Figure 2b), we called 140,772 accessible genomic loci that were  
334 used in subsequent analysis.

335 We performed topic modeling on the cell  $\times$  peak matrix followed by clustering, cell type identification, and  
336 visualization on the cell  $\times$  topic matrix (Figures 4c and 4d), which revealed comparable cell type proportions  
337 across biological samples with exceptions for microglia/macrophages and a chromatin-disrupted cluster  
338 that were highly enriched within the infarct. We profiled cell type proportions along both of the axes  
339 (Extended Data Figures 5c); however, the pial to striatum axis (punch positions 1-4) in stroke hemisphere  
340 samples is completely within the infarct core. In contrast, the infarct core-to-border axis (punch positions 5-  
341 8) progresses from the center of the infarct to the glial scar along the infarct border, capturing a transition  
342 zone of reactive gliosis, and is the spatial trajectory that we focus on in our subsequent analysis. Along this  
343 progression, we found that the stroke hemisphere had diminished neural cell types (depletion of  
344 glutamatergic and GABAergic neurons, oligodendrocytes and astrocytes) as well as a progressive increase

345 in cells within a cluster exhibiting globally disrupted chromatin structure up to punch position 7 and a drop  
346 at punch position 8 upon entering the infarct border (Extended Data Figure 5d). This state is predominantly  
347 characterized by globally increased chromatin accessibility, with a decrease in TSS enrichment, a  
348 decrease in FRiS, and an increase in reads falling within distal intergenic regions, which is likely caused by  
349 cell death (Extended Data Figures 5e and 5f). In addition to the global effects on chromatin structure, the  
350 chromatin-disrupted cell population also showed strong enrichment in one of the topics (Topic 30; Figure  
351 4e, left). A gene ontology (GO) enrichment analysis of the peaks that define Topic 30 revealed that cells  
352 within the ischemic hemisphere undergo a chromatin state shift as a result of the ischemic cascade, which  
353 leads to enrichment for processes canonically associated with ischemia (Figure 4e, right). Most notably,  
354 positive regulation of synaptic membrane adhesion, synaptic depression, assembly, transmission, and  
355 membrane potential were all enriched in ischemia-derived cells, indicating that CNS synaptogenesis is  
356 upregulated in a subset of cells three days post-ischemia<sup>39,40</sup>. Additionally, while the percentage of  
357 microglia increased in the stroke condition (13.2%) as compared to contralateral (6.7%) and naïve (4.3%),  
358 depletion of immune response processes (B-cell mediated immunity, humoral immune response mediated  
359 by circulating immunoglobulins) were seen in ischemia-derived cells. This recapitulates previous findings  
360 that acute ischemic immune response is followed by post-stroke immunodepression and dysregulation<sup>41,42</sup>.

361 To directly characterize the relationship between space and epigenetic state in cerebral ischemia, we  
362 assessed transcription factor (TF) DNA binding motif enrichments for each cell and performed a regression  
363 for all cells across the infarct core-to-border axis (punch positions 5-8) in the stroke and contralateral  
364 hemispheres. We used the difference between linear model coefficients for paired affected (stroke) and  
365 unaffected (contralateral) hemispheres along with the significance of the hemisphere motif enrichment  
366 differences to identify putative TFs that undergo spatially progressive regulatory changes (Methods). In  
367 total, we identified 56 TF motifs that were significantly altered with a spatial component, many of which  
368 have been previously reported as key factors identified in cerebral ischemia (Figure 4f and 4g). KLF9  
369 demonstrated the most significant increase in accessibility with proximity to the peri-infarct area and is a  
370 member of the Kruppel-like factor (KLF) family. The seventeen KLF family transcription factors are key  
371 factors in neuronal development, plasticity, and axon regeneration and are ubiquitously expressed in the  
372 CNS. Several KLF family members, namely KLF2, 4, 5, 6, and 11, have been specifically linked to cerebral  
373 ischemia pathogenesis<sup>43,44</sup>. Notably, KLF2 and KLF11 have been shown to contribute to the protection of  
374 the blood-brain barrier (BBB) in cerebral ischemia<sup>45-47</sup>. However, as DNA binding motifs within the KLF  
375 family are similar, members of the KLF family other than KLF9 may be driving this accessibility change.  
376 Finally, we assessed the accessibility of individual elements and identified 3,852 peaks that varied  
377 significantly through the 5-8 axis of spatial progression (Methods; Extended Data Figure 5g).

378 We next explored the cell type specificity of the KLF9 motif accessibility changes (Figure 4h). In the stroke  
379 hemisphere chromatin-disrupted cell subset, we observed a reduction in KLF9 motif accessibility in all

380 punch positions except punch position 8, at the infarct border, with all cell types other than microglia  
381 showing a reduction in accessibility at the center of the infarct core (punch position 5). Uniquely, microglia  
382 are largely unaffected and have comparable KLF9 TF binding motif enrichment at the infarct core in  
383 comparison to the contralateral hemisphere. In addition to KLF9, we also identified STAT3 as varying  
384 significantly over space (Extended Data Figure 5h), which was also an enriched GO term in stroke cells  
385 (Figure 4e). STAT3 has been extensively studied in the JAK/STAT3 pathway, which is a key regulator of  
386 apoptosis in cerebral ischemia injuries with reperfusion<sup>48</sup> as well as an initiator of reactive astrogliosis  
387 under diverse conditions<sup>49</sup>. Accordingly, we found that STAT3 was largely absent from astrocytes in  
388 punches positions 5-7 but was enriched in the reactive astrocytes at the infarct border zone at punch  
389 position 8. In contrast, we find that RE1-silencing factor (REST) is significantly elevated at the ischemic  
390 core and decreases with proximity to the infarct border. Accordingly, REST has been shown to form a  
391 histone deacetylase complex that is a director repressor of SP1 in cerebral ischemia, a TF we identify as  
392 varying significantly over space, in the opposite direction of REST<sup>35</sup> (Extended Data Figure 5i).

393 We next sought to characterize chromatin accessibility profiles of cells isolated from a single punch at the  
394 glial scar (Figure 4i). To do this, we isolated two punches (punch 40 and 48), both originating from the  
395 same section (15\_SB2), from punch position 8 of the stroke (punch 40) and contralateral hemisphere  
396 (punch 48). We processed the cells in isolation as described in prior individual punch analyses, using the  
397 peak set from the full experiment. We performed DNA binding motif enrichment analysis across all cells<sup>50</sup>  
398 and then performed cell-type-specific comparisons for a glial (oligodendrocyte) and neuronal (glutamatergic  
399 neuron) cell type. In oligodendrocytes, 56 TF motifs were significantly different between the stroke and  
400 contralateral hemisphere, many of which (78.6%) corresponded to higher enrichment in stroke as  
401 compared to contralateral. Specifically, we found BCL11B (CTIP2), a negative regulator of glial progenitor  
402 cell differentiation to be significantly increased at the glial scar around the infarct (Figure 4i, left)<sup>51</sup>.  
403 Conversely, we found RXRG, a positive regulator of OPC differentiation, and remyelination, to be  
404 significantly depleted (Figure 4i, left)<sup>52</sup>. Together these findings indicate impaired ability of OPCs to  
405 differentiate into mature oligodendrocytes at the glial scar. In glutamatergic neurons, we found neuron-  
406 associated TFs such as Neurod2 to be significantly depleted in the stroke hemisphere, which corresponds  
407 with decreased neuronal cell types at punch position 8 in the stroke hemisphere. In accordance with our  
408 infarct core-to-border axis (punch positions 5-8) analysis, we found that seven of the KLF family of TFs  
409 (KLF 2-4, 6-8, and 12) were significantly depleted in glutamatergic neurons at the glial scar in the stroke  
410 hemisphere (Figure 4i, right; KLF4 and KLF7 shown). Interestingly, previous studies have found that in  
411 response to cerebral ischemia, KLF 4, 5, and 6 are induced in astrocytes, while KLF2 is depleted in  
412 endothelia and induced in microglia<sup>53</sup>. With these data we identify that motif enrichment for many members  
413 of the KLF family not only significantly vary over space across all cell types, we also indicate novel  
414 depletion of multiple KLFs specifically in glutamatergic neurons at the ischemic glial scar.

## 415 Discussion

416 sciMAP-ATAC provides a low-cost, highly scalable, hypothesis-independent approach to acquiring spatially  
417 resolved epigenomic single-cell data with the use of immediately available commercial tools. Additionally,  
418 sciMAP-ATAC is translatable to any tissue, culture, or model system compatible with cryosectioning. While  
419 many methods rely on signal-to-noise optical detection of densely packed molecules and computationally  
420 intensive spatial reconstruction, sciMAP-ATAC encodes nuclear localization directly into each library  
421 molecule, allowing for rapid subsetting of cells by localization and mapping of cells across vector space in  
422 3D. We demonstrate the use of sciMAP-ATAC to profile the murine somatosensory cortex, as well as multi-  
423 punch trajectories through the human primary visual cortex, recapitulating known marker gene progression  
424 through cortical layering and cell type composition based on the category and positioning of spatially  
425 registered microbiopsy punches. We further show the utility of sciMAP-ATAC to resolve the progressive  
426 epigenomic changes in a cerebral ischemia model system, revealing distinct trends in chromatin  
427 accessibility, cell type composition, and cell states along the axes of tissue damage and altered  
428 morphology. Application of sciMAP-ATAC to other highly structured systems or tissues with a gradient of  
429 disease phenotype will be particularly valuable areas for this technology. The primary limitation of sciMAP-  
430 ATAC is that punches are currently performed manually and registered with adjacent imaged sections post-  
431 punching. This limits the precision of desired punch positions as well as throughput; however, automated  
432 processing of tissue sections using robotics<sup>54</sup> where punch patterns are designed on adjacent imaged  
433 sections and registered to the target section will enable high-precision, as well as increased throughput into  
434 the range of thousands. Furthermore, as spatial transcriptomic technologies evolve, they may enable the  
435 acquisition of chromatin accessibility information; however, substantial technical hurdles must first be  
436 overcome, and profiles produced would be in aggregate over the feature size and not necessarily single-  
437 cell. Finally, here we applied the sciMAP strategy to assess chromatin accessibility; however, it can, in  
438 theory, be applied to any single-cell combinatorial indexing technique to enable spatially registered single-  
439 cell genome<sup>19</sup>, transcriptome<sup>55</sup>, chromatin folding<sup>56</sup>, methylation<sup>57</sup>, or multi-omic<sup>58-60</sup> assays.

## 440 Figure Legends

441 **Figure 1 | sciMAP-ATAC schematic and performance.** **a.** sciMAP-ATAC workflow. Cryosectioning of  
442 alternating 20  $\mu\text{m}$  (histological) and 100-300  $\mu\text{m}$  (sciMAP-ATAC) slices are obtained. Thin (20  $\mu\text{m}$ ) slices  
443 are stained and imaged for use in spatial registration (Scale bar, 1mm). Thick (100-300  $\mu\text{m}$ ) slices are  
444 carried through high-density micro biopsy punching (100-500  $\mu\text{m}$  diameter) in the cryostat chamber.  
445 Punches are placed directly into wells of a microwell plate for nuclei isolation and washed prior to splitting  
446 into multiple wells for indexed transposition and the sci-ATAC-seq workflow. **b.** Four punch volumes were  
447 assessed for nuclei yield using either a 250  $\mu\text{m}$  or 500  $\mu\text{m}$  diameter punch on a 200  $\mu\text{m}$  or 300  $\mu\text{m}$  thick  
448 section. Total nuclei isolated for each punch is shown on the left, and normalized for tissue voxel volume  
449 on the right, representing the efficiency of extraction from each punch. **c.** Passing reads per cell from sci-  
450 ATAC-seq and sciMAP-ATAC, which are comparable at the level of depth sequenced. **d.** ATAC read signal  
451 at TSSs for sci-ATAC-seq and sciMAP-ATAC. Enrichment for sci-ATAC-seq is slightly greater than that of  
452 sciMAP-ATAC, likely due to increased processing time of isolated nuclei prior to transposition. **e.** sciMAP-  
453 ATAC and sci-ATAC-seq libraries from mouse brain group closely together. Asterisk indicates a population  
454 of 734 cells, derived from spinal cord, which was not sampled during micro biopsy punching.

455 **Figure 2 | sciMAP-ATAC reveals spatially distinct cell type composition in the mouse**  
456 **somatosensory cortex.** **a.** Experiment schematic of sciMAP-ATAC in the mouse somatosensory cortex.  
457 **b.** DAPI and SATB2 staining of SSp cortex from sciMAP-ATAC histological section (scale bar, 50  $\mu\text{m}$ ). **c.**  
458 UMAP of 7,779 cells colored by punch location category. Each category contains cells from 32 spatially  
459 distinct tissue punches. **d.** UMAP as in c. colored by cell type. **e.** ATAC-seq profiles for cells aggregated by  
460 cell type for marker genes. **f.** Aggregate cell type composition over punches belonging to the broad region  
461 categories. **g.** Cell type composition for each of the 96 individual punches split by broad region category. **h.**  
462 Topic weight matrix for cells present only in a single punch (F5, inner cortex punch). **i.** UMAP of cells from  
463 punch F5 showing spatially distinct groupings for cell types. Cells are colored by cell identity from panel d.  
464 **j.** UMAP of glutamatergic neuron cells from two adjacent punches (C5, inner cortex, and B5, outer cortex)  
465 after topic modeling on the isolated cell profiles. **k.** Transcription factor motif enrichments for glutamatergic  
466 cells from adjacent punches shown in j. Two-sided Mann–Whitney  $U$  test with Bonferroni-Holm correction.  
467 Center value represents median.

468 **Figure 3 | sciMAP-ATAC trajectories through the human primary visual cortex.** **a.** sciMAP-ATAC  
469 punching schematic showing one of three adjacent sections. A total of 21 eight-punch trajectories spanning  
470 the cortex were produced. **b.** UMAP of cells colored by position within their respective trajectory. **c.** UMAP  
471 as in b. colored by cell type identity. **d.** ATAC-seq profiles for cells aggregated by cell type for marker  
472 genes. **e.** Aggregate cell type composition across the 21 trajectories. Colors are the same as in d. **f.** Cell  
473 type composition for each of the 188 individual punches split by trajectory position. Punches from the WM

474 indicated by an asterisk are aggregated by section. Colors are the same as in d. **g.** ATAC-seq profiles for  
475 glutamatergic neurons along trajectory positions for layer-specific marker genes CALB1 (layers 2 and 3),  
476 LMO4 (layer 5) and CTGF (layer 6b). **h.** UMAP of glutamatergic neurons from a single trajectory (Section  
477 1, Trajectory 4: T1.4) after topic modeling on the isolated cells. Cells are colored by position along the  
478 trajectory. **i.** DNA binding motif enrichment for layer-specific factors for Trajectory 1.4 shown in panel h.  
479 with cells split by their positions along the trajectory.

480 **Figure 4 | sciMAP-ATAC reveals spatially progressive epigenetic disruption in ischemic injury. a.**  
481 Experimental design using a mouse MCAO model of ischemic injury. Mice were sacrificed three days post-  
482 surgery and brains flash frozen in TFM. Alternating thin (20  $\mu\text{m}$ ) and thick (200  $\mu\text{m}$ ) sections were  
483 processed using IHC to define infarction (red outline) and peri-infarct area (pink outline) and sciMAP-ATAC  
484 punching schematic, respectively. **b.** GFAP IHC of a 20  $\mu\text{m}$  coronal section of an ischemic mouse brain.  
485 Punch positions along the 5-8 axis (core-to-border) are indicated. Background corrected GFAP  
486 fluorescence along the 5-8 axis is shown to the right for stroke and contralateral hemispheres. Line shows  
487 linear fit  $\pm$  s.e. (Scale bar, 1 mm) **c.** UMAP of cells colored by the three conditions. **d.** UMAP as in (c)  
488 colored by clusters assigned to cell types. **e.** Cell  $\times$  Topic matrix colored by topic weights, and annotated by  
489 cell types and conditions (bottom) reveals substantially divergent topic weighting in cells from the stroke  
490 punches (left). Topic 30, enriched specifically in the stroke cells belonging to the chromatin-disrupted  
491 cluster has peaks enriched for ontologies associated with ischemic injury with reperfusion. Colored by -  
492  $\text{Log}_{10}$  false discovery rate (FDR) Q-value, height by  $\text{log}_2$  Fold Enrichment. **f.** Volcano plot of Z-scored TF  
493 enrichment slope change across punches 5-8 ( $\Delta\text{slope} = \text{slope}_{\text{stroke}} - \text{slope}_{\text{contralateral}}$ ) by  $-\text{log}_{10}$   $P$  value of the  
494 two-way ANOVA from the interaction of TF motif enrichment per punch by condition (stroke, contralateral).  
495 **g.** Top hits for significantly different changes in TF motif enrichment over space as compared between  
496 stroke and contralateral; Klf9 (top) and Bhlha15 (bottom).  $-\text{Log}_{10}$   $P$  value of the two-way ANOVA from the  
497 interaction of TF motif enrichment per punch by condition (stroke, contralateral). Line shows linear fit  $\pm$  s.e.  
498 **h.** KLF9 TF motif enrichment over space reveals cell type contribution to Klf9 enrichment from infarct core  
499 to peri-infarct area. **i.** Comparison of TF motif enrichment at the infarct border (punch position 8) between  
500 stroke (punch 40) and contralateral (punch 48) single-cell profiles. Oligodendrocyte TF motif enrichment  
501 shown for BCL11B and RXRG. Glutamatergic neuron TF motif enrichment shown for KLF4 and KLF7.  
502 Two-sided Mann–Whitney  $U$  test with Bonferroni-Holm correction. Center value represents median.

503 **Extended Data Figure 1 | Overview of single-cell ATAC profiles produced across experimental**  
504 **conditions.** Quality-passing single-cell ATAC-seq profiles for each experimental condition or spatially  
505 resolved punch (for sciMAP-ATAC) as a percentage of the experiment (or average  $\pm$  standard deviation)  
506 for: **a.** sci-ATAC-seq on fresh vs. frozen mouse whole brain hemisphere; **b.** sciMAP-ATAC development  
507 across four dissociation methods and individual punches from each dissociation method; **c.** sciMAP-ATAC  
508 on mouse SSp by biological replicate, class of sampled region, individual section, and individual punch; **d.**

509 human VISp sciMAP-ATAC by section, class of sampled region, individual trajectory and individual punch;  
510 and **e.** sciMAP-ATAC on a mouse model of cerebral ischemia by biological replicate, class of sampled  
511 region, section and individual punch.

512 **Extended Data Figure 2 | Quality metrics across all experiments. a.** Log<sub>10</sub> passing reads obtained per  
513 cell at the depth of sequencing for this study. **b.** The fraction of reads present in a reference set of peaks  
514 (FRiS) for each experiment. The master list of peaks for mouse are aggregated from ATAC-seq data  
515 produced by the ENCODE project, and for human it is from a single study on DNase hypersensitivity<sup>28</sup>. **c-e.**  
516 Left: aggregate read density centered on TSS sites present in the genome with TSS enrichment values  
517 listed by each class calculated using the ENCODE method; middle: FRiS distributions for cells within each  
518 punch produced in the experiment split by section; and right: Punch distributions of cell counts for each  
519 category within the experiment split by section, for mouse SSp (**c.**), human VISp (**d.**) and mouse cerebral  
520 ischemia (**e.**) experiments.

521 **Extended Data Figure 3 | Extended analysis of the mouse somatosensory cortex sciMAP-ATAC**  
522 **dataset. a.** Integration of all healthy mouse brain sci-ATAC-seq and sciMAP-ATAC datasets visualized in a  
523 UMAP. From left to right: all cells colored by either the regional category of punch position for the SSp  
524 experiment and then cell from whole brain experiments – asterisk indicates the population of cells only  
525 present in the whole brain dataset; cells are grayed out except for those from punches taken from the outer  
526 cortex, inner cortex, stratum and then whole brain. Below the whole brain panel, cells from the fresh and  
527 frozen sci-ATAC-seq experiments are indicated. **b.** The same integrated UMAP with cells colored by  
528 identified cell type. Asterisk indicates the population of GABAergic neurons only present in whole brain  
529 datasets that represent spinal cord derived interneurons. **c.** HOXB5 and HOXB7 are two example motifs  
530 that exhibit increased accessibility in the spinal cord derived interneuron population. **d.** ATAC reads for  
531 cells (rows) are shown for the *Gna14* locus with cells colored by broad cell type. The cluster representing  
532 spinal cord derived interneurons is split out and shown in black with the uniquely accessible loci circled. **e.**  
533 UMAP of the SSp dataset with cells colored by log<sub>10</sub> passing read counts. **f.** UMAP of the SSp dataset  
534 with cells grayed out except for each of the three regional punch categories. **g.** UMAP of cells from punch  
535 F5 that were processed using peaks called on the full SSp dataset colored by the three clusters that were  
536 identified. **h.** UMAP of cells from punch F5 that were processed using peaks called on only those cells  
537 colored by their cell type as identified in the full SSp dataset analysis and **i.** colored by the two clusters that  
538 were identified. **j.** Motif accessibility for the isolated punch F5 analysis indicating that Cluster 1 is made up  
539 of glutamatergic neurons and Cluster 2 is made up of other cell types.

540 **Extended Data Figure 4 | Extended analysis of the human primary visual cortex sciMAP-ATAC**  
541 **dataset. a.** UMAP of all cells from the experiment colored by log<sub>10</sub> passing read counts. **b.** UMAP of the  
542 full dataset with all cells grayed out except for those belonging to the middle trajectory of 8 punches on the



543 first section (Trajectory 1.4). **c.** UMAP of cells from Trajectory 1.4 that were processed using peaks from  
544 the full VISp dataset colored by the punch position; **d.** the cell type classification as determined from the full  
545 dataset; and **e.** the six clusters that were identified. **f.** UMAP of cells from Trajectory 1.4 that were  
546 processed using peaks called using only those cells colored by the punch position; **g.** the cell type  
547 classification as determined from the full dataset; and **h.** the four clusters that were identified.

548 **Extended Data Figure 5 | Extended analysis of the cerebral ischemia sciMAP-ATAC dataset.** **a.**  
549 GFAP staining of an imaging section from a stroke brain (left), with punch positions and labels shown  
550 (middle), and punch positions with the stroke region overlaid in red (right). **b.** UMAP of cells from the  
551 cerebral ischemia experiment colored by the log10 passing read counts. **c.** Cell type composition for each  
552 punch in the experiment grouped by individual section and more broadly by category. **d.** Aggregated cell  
553 type composition for the 1-4 axis (top) and 5-8 axis (bottom) split by category of tissue. **e.** FRiS values for  
554 cells split by called cell type indicating a substantial decrease in FRiS for the chromatin-disrupted cluster. **f.**  
555 Enrichment for topics with respect to genomic category showing that Topic 30, which is elevated in cells  
556 within the chromatin-disrupted cluster, is enriched for distal intergenic regions – further supporting a global  
557 laxing of chromatin, likely due to cell death. **g.** Regulatory elements that change significantly and uniformly  
558 along the 5-8 axis. **h.** Motif enrichment along the 5-8 axis for stroke and contralateral hemispheres split by  
559 cell type. **i.** REST and SP1 normalized motif enrichment along the 5-8 axis shows opposite trends between  
560 the two factors as well as for each factor between the stroke and contra hemispheres.

561 **Extended Data File 1 | Marker gene accessibility plots.** Read depth aggregated by identified cell types  
562 are plotted for cell type identification marker genes for the mouse SSp, human VISp, and mouse cerebral  
563 ischemia sciMAP-ATAC datasets.

564 **Extended Data File 2 | UMAPs split by each individual punch or trajectory.** UMAPs for the mouse SSp  
565 and cerebral ischemia experiment are shown with all cells grayed out except for each indicated punch as  
566 well as UMAPs for the human VISp experiment with all cells grayed out except for each individual punch  
567 trajectory.

## 568 References

- 569 1. Buscemi, L., Price, M., Bezzi, P. & Hirt, L. Spatio-temporal overview of neuroinflammation in an experimental  
570 mouse stroke model. *Sci. Rep.* **9**, 507 (2019).
- 571 2. Tasic, B. *et al.* Adult mouse cortical cell taxonomy revealed by single cell transcriptomics. *Nat. Neurosci.* **19**,  
572 335–346 (2016).
- 573 3. Cusanovich, D. A. *et al.* A Single-Cell Atlas of In Vivo Mammalian Chromatin Accessibility. *Cell* **174**, 1309-  
574 1324.e18 (2018).
- 575 4. Adesnik, H. & Naka, A. Cracking the Function of Layers in the Sensory Cortex. *Neuron* **100**, 1028–1043  
576 (2018).
- 577 5. Fan, X. *et al.* Spatial transcriptomic survey of human embryonic cerebral cortex by single-cell RNA-seq  
578 analysis. *Cell Res.* **28**, 730–745 (2018).
- 579 6. Hevner, R. F. Layer-Specific Markers as Probes for Neuron Type Identity in Human Neocortex and  
580 Malformations of Cortical Development. *J. Neuropathol. Exp. Neurol.* **66**, 101–109 (2007).
- 581 7. Gray, L. T. *et al.* Layer-specific chromatin accessibility landscapes reveal regulatory networks in adult mouse  
582 visual cortex. *Elife* **6**, e21883 (2017).
- 583 8. Lubeck, E., Coskun, A. F., Zhiyentayev, T., Ahmad, M. & Cai, L. Single-cell in situ RNA profiling by sequential  
584 hybridization. *Nat. Methods* **11**, 360 (2014).
- 585 9. Chen, K. H., Boettiger, A. N., Moffitt, J. R., Wang, S. & Zhuang, X. Spatially resolved, highly multiplexed RNA  
586 profiling in single cells. *Science (80-. )*. **348**, aaa6090 (2015).
- 587 10. Eng, C.-H. L. *et al.* Transcriptome-scale super-resolved imaging in tissues by RNA seqFISH+. *Nature* **568**,  
588 235–239 (2019).
- 589 11. Rodriques, S. G. *et al.* Slide-seq: A scalable technology for measuring genome-wide expression at high spatial  
590 resolution. *Science (80-. )*. **363**, 1463 LP – 1467 (2019).
- 591 12. Vickovic, S. *et al.* High-definition spatial transcriptomics for in situ tissue profiling. *Nat. Methods* **16**, 987–990  
592 (2019).
- 593 13. Islam, S. *et al.* Quantitative single-cell RNA-seq with unique molecular identifiers. *Nat. Methods* **11**, 163  
594 (2013).
- 595 14. Hwang, B., Lee, J. H. & Bang, D. Single-cell RNA sequencing technologies and bioinformatics pipelines. *Exp.*  
596 *Mol. Med.* **50**, 96 (2018).
- 597 15. Topper, M. J., Vaz, M., Marrone, K. A., Brahmer, J. R. & Baylin, S. B. The emerging role of epigenetic  
598 therapeutics in immuno-oncology. *Nat. Rev. Clin. Oncol.* (2019). doi:10.1038/s41571-019-0266-5
- 599 16. Kato, M. & Natarajan, R. Epigenetics and epigenomics in diabetic kidney disease and metabolic memory. *Nat.*  
600 *Rev. Nephrol.* **15**, 327–345 (2019).
- 601 17. Hwang, J.-Y., Aromolaran, K. A. & Zukin, R. S. The emerging field of epigenetics in neurodegeneration and  
602 neuroprotection. *Nat. Rev. Neurosci.* **18**, 347 (2017).
- 603 18. Cusanovich, D. A. *et al.* Multiplex single-cell profiling of chromatin accessibility by combinatorial cellular  
604 indexing. *Science (80-. )*. **348**, 910 LP – 914 (2015).
- 605 19. Vitak, S. A. *et al.* Sequencing thousands of single-cell genomes with combinatorial indexing. *Nat. Methods* **14**,  
606 302 (2017).
- 607 20. Gerlinger, M. *et al.* Genomic architecture and evolution of clear cell renal cell carcinomas defined by  
608 multiregion sequencing. *Nat. Genet.* **46**, 225–233 (2014).
- 609 21. Erramuzpe, A., Cortés, J. M. & López, J. I. Multisite tumor sampling enhances the detection of intratumor  
610 heterogeneity at all different temporal stages of tumor evolution. *Virchows Arch.* **472**, 187–194 (2018).
- 611 22. Sinnamon, J. R. *et al.* The accessible chromatin landscape of the murine hippocampus at single-cell  
612 resolution. *Genome Res.* **29**, 857–869 (2019).
- 613 23. Palkovits, M. Isolated removal of hypothalamic or other brain nuclei of the rat. *Brain Res.* **59**, 449–450 (1973).

- 614 24. Corces, M. R. *et al.* An improved ATAC-seq protocol reduces background and enables interrogation of frozen  
615 tissues. *Nat. Methods* **14**, 959–962 (2017).
- 616 25. Lein, E. S. *et al.* Genome-wide atlas of gene expression in the adult mouse brain. *Nature* **445**, 168–176  
617 (2007).
- 618 26. Alcamo, E. A. *et al.* Satb2 Regulates Callosal Projection Neuron Identity in the Developing Cerebral Cortex.  
619 *Neuron* **57**, 364–377 (2008).
- 620 27. Erö, C., Gewaltig, M.-O., Keller, D. & Markram, H. A Cell Atlas for the Mouse Brain. *Front. Neuroinform.* **12**, 84  
621 (2018).
- 622 28. Vierstra, J. *et al.* Global reference mapping and dynamics of human transcription factor footprints. *bioRxiv*  
623 (2020). doi:10.1101/2020.01.31.927798
- 624 29. Lal, A. *et al.* AtacWorks: A deep convolutional neural network toolkit for epigenomics. *bioRxiv* 829481 (2019).  
625 doi:10.1101/829481
- 626 30. Endres, M. *et al.* DNA Methyltransferase Contributes to Delayed Ischemic Brain Injury. *J. Neurosci.* **20**, 3175  
627 LP – 3181 (2000).
- 628 31. Chakravarty, S. *et al.* Insights into the epigenetic mechanisms involving histone lysine methylation and  
629 demethylation in ischemia induced damage and repair has therapeutic implication. *Biochim. Biophys. Acta -*  
630 *Mol. Basis Dis.* **1863**, 152–164 (2017).
- 631 32. Chisholm, N. C. *et al.* Histone methylation patterns in astrocytes are influenced by age following ischemia.  
632 *Epigenetics* **10**, 142–152 (2015).
- 633 33. Faraco, G. *et al.* Pharmacological Inhibition of Histone Deacetylases by Suberoylanilide Hydroxamic Acid  
634 Specifically Alters Gene Expression and Reduces Ischemic Injury in the Mouse Brain. *Mol. Pharmacol.* **70**,  
635 1876 LP – 1884 (2006).
- 636 34. Formisano, L. *et al.* Ischemic insults promote epigenetic reprogramming of mu opioid receptor expression in  
637 hippocampal neurons. *Proc. Natl. Acad. Sci. U. S. A.* **104**, 4170–4175 (2007).
- 638 35. Formisano, L. *et al.* Sp3/REST/HDAC1/HDAC2 Complex Represses and Sp1/HIF-1/p300 Complex Activates  
639 ncx1 Gene Transcription, in Brain Ischemia and in Ischemic Brain Preconditioning, by Epigenetic Mechanism.  
640 *J. Neurosci.* **35**, 7332 LP – 7348 (2015).
- 641 36. Yi, J.-H., Park, S.-W., Kapadia, R. & Vemuganti, R. Role of transcription factors in mediating post-ischemic  
642 cerebral inflammation and brain damage. *Neurochem. Int.* **50**, 1014–1027 (2007).
- 643 37. Payne, S. C. *et al.* Early Proliferation Does Not Prevent the Loss of Oligodendrocyte Progenitor Cells during  
644 the Chronic Phase of Secondary Degeneration in a CNS White Matter Tract. *PLoS One* **8**, e65710 (2013).
- 645 38. Dingman, A. L. *et al.* Oligodendrocyte Progenitor Cell Proliferation and Fate after White Matter Stroke in  
646 Juvenile and Adult Mice. *Dev. Neurosci.* (2019). doi:10.1159/000496200
- 647 39. Paul, S. R., A., K. T. & E., H. C. Neocortical Neural Sprouting, Synaptogenesis, and Behavioral Recovery After  
648 Neocortical Infarction in Rats. *Stroke* **26**, 2135–2144 (1995).
- 649 40. Lindvall, O. & Kokaia, Z. Neurogenesis following Stroke Affecting the Adult Brain. *Cold Spring Harb. Perspect.*  
650 *Biol.* **7**, (2015).
- 651 41. Famakin, B. M. The Immune Response to Acute Focal Cerebral Ischemia and Associated Post-stroke  
652 Immunodepression: A Focused Review. *Aging Dis.* **5**, 307–326 (2014).
- 653 42. Becker, K. J. Modulation of the postischemic immune response to improve stroke outcome. *Stroke* **41**, S75–  
654 S78 (2010).
- 655 43. Apará, A. *et al.* KLF9 and JNK3 Interact to Suppress Axon Regeneration in the Adult CNS. *J. Neurosci.* **37**,  
656 9632 LP – 9644 (2017).
- 657 44. Moore, D. L., Apará, A. & Goldberg, J. L. Krüppel-like transcription factors in the nervous system: novel  
658 players in neurite outgrowth and axon regeneration. *Mol. Cell. Neurosci.* **47**, 233–243 (2011).
- 659 45. Tang, X., Liu, K., Hamblin, M. H., Xu, Y. & Yin, K.-J. Genetic Deletion of Krüppel-Like Factor 11 Aggravates  
660 Ischemic Brain Injury. *Mol. Neurobiol.* **55**, 2911–2921 (2018).
- 661 46. Shi, H. *et al.* Kruppel-like factor 2 protects against ischemic stroke by regulating endothelial blood brain barrier

- 662 function. *Am. J. Physiol. Heart Circ. Physiol.* **304**, H796–H805 (2013).
- 663 47. Yin, K.-J. *et al.* KLF11 mediates PPAR $\gamma$  cerebrovascular protection in ischaemic stroke. *Brain* **136**, 1274–1287  
664 (2013).
- 665 48. Hu, G.-Q. *et al.* Inhibition of cerebral ischemia/reperfusion injury-induced apoptosis: nicotiflorin and  
666 JAK2/STAT3 pathway. *Neural Regen. Res.* **12**, 96–102 (2017).
- 667 49. O’Callaghan, J. P., Kelly, K. A., VanGilder, R. L., Sofroniew, M. V & Miller, D. B. Early activation of STAT3  
668 regulates reactive astrogliosis induced by diverse forms of neurotoxicity. *PLoS One* **9**, e102003–e102003  
669 (2014).
- 670 50. Schep, A. N., Wu, B., Buenrostro, J. D. & Greenleaf, W. J. chromVAR: inferring transcription-factor-associated  
671 accessibility from single-cell epigenomic data. *Nat. Methods* **14**, 975 (2017).
- 672 51. Wang, C.-Y. *et al.* Function of B-Cell CLL/Lymphoma 11B in Glial Progenitor Proliferation and Oligodendrocyte  
673 Maturation. *Frontiers in Molecular Neuroscience* **11**, 4 (2018).
- 674 52. Huang, J. K. *et al.* Retinoid X receptor gamma signaling accelerates CNS remyelination. *Nat. Neurosci.* **14**,  
675 45–53 (2011).
- 676 53. Yin, K.-J., Hamblin, M., Fan, Y., Zhang, J. & Chen, Y. E. Krüppel-like factors in the central nervous system:  
677 novel mediators in stroke. *Metab. Brain Dis.* **30**, 401–410 (2015).
- 678 54. Yoda, T. *et al.* Site-specific gene expression analysis using an automated tissue micro-dissection punching  
679 system. *Sci. Rep.* **7**, 4325 (2017).
- 680 55. Cao, J. *et al.* Comprehensive single-cell transcriptional profiling of a multicellular organism. *Science (80-. )*.  
681 **357**, 661–667 (2017).
- 682 56. Ramani, V. *et al.* Massively multiplex single-cell Hi-C. *Nat. Methods* **14**, 263–266 (2017).
- 683 57. Mulqueen, R. M. *et al.* Highly scalable generation of DNA methylation profiles in single cells. *Nat. Biotechnol.*  
684 **36**, 428–431 (2018).
- 685 58. Cao, J. *et al.* Joint profiling of chromatin accessibility and gene expression in thousands of single cells.  
686 *Science (80-. )*. **361**, 1380 LP – 1385 (2018).
- 687 59. Zhu, C. *et al.* An ultra high-throughput method for single-cell joint analysis of open chromatin and  
688 transcriptome. *Nat. Struct. Mol. Biol.* (2019). doi:10.1038/s41594-019-0323-x
- 689 60. Ma, S. *et al.* Chromatin potential identified by shared single cell profiling of RNA and chromatin. *bioRxiv*  
690 2020.06.17.156943 (2020). doi:10.1101/2020.06.17.156943
- 691 61. Longa, E. Z., Weinstein, P. R., Carlson, S. & Cummins, R. Reversible middle cerebral artery occlusion without  
692 craniectomy in rats. *Stroke* **20**, 84–91 (1989).
- 693 62. Schindelin, J. *et al.* Fiji: an open-source platform for biological-image analysis. *Nat. Methods* **9**, 676–682  
694 (2012).
- 695 63. Picelli, S. *et al.* Tn5 transposase and tagmentation procedures for massively scaled sequencing projects.  
696 *Genome Res.* **24**, 2033–2040 (2014).
- 697 64. Cusanovich, D. A. *et al.* Multiplex single-cell profiling of chromatin accessibility by combinatorial cellular  
698 indexing. *Science (80-. )*. **348**, 910–914 (2015).
- 699 65. Li, H. & Durbin, R. Fast and accurate long-read alignment with Burrows-Wheeler transform. *Bioinformatics* **26**,  
700 589–595 (2010).
- 701 66. Zhang, Y. *et al.* Model-based Analysis of ChIP-Seq (MACS). *Genome Biol.* **9**, R137 (2008).
- 702 67. Bravo González-Blas, C. *et al.* cisTopic: cis-regulatory topic modeling on single-cell ATAC-seq data. *Nat.*  
703 *Methods* **16**, 397–400 (2019).
- 704 68. Gu, Z., Eils, R. & Schlesner, M. Complex heatmaps reveal patterns and correlations in multidimensional  
705 genomic data. *Bioinformatics* (2016).
- 706 69. Levine, J. H. *et al.* Data-Driven Phenotypic Dissection of AML Reveals Progenitor-like Cells that Correlate with  
707 Prognosis. *Cell* **162**, 184–197 (2015).

- 708 70. Neph, S. *et al.* BEDOPS: high-performance genomic feature operations. *Bioinformatics* **28**, 1919–1920 (2012).
- 709 71. McLean, C. Y. *et al.* GREAT improves functional interpretation of cis-regulatory regions. *Nat. Biotechnol.* **28**,  
710 495–501 (2010).
- 711 72. Blighe K, Rana S, L. M. EnhancedVolcano: Publication-ready volcano plots with enhanced colouring and  
712 labeling. *R Packag. version 1.4.0* (2019).
- 713

714 **Acknowledgments**

715 We thank members of the Adey, O’Roak, and Wright labs for their support; Kylee Rosette for assistance  
716 with animal husbandry; Eleonora Juarez for discussion on protocol development; Anthony P. Barnes and  
717 Brian J. O’Roak for helpful discussions on experimental design; and Dominica Cao and Brooke DeRosa for  
718 IHC staining.

719 **Funding**

720 This work was supported by the NIH Brain Initiative, National Institute for Drug Abuse (1R01DA047237),  
721 and the NIH National Institute for General Medical Studies (R35GM124704) to A.C.A.; and an OHSU Early  
722 Independence Fellowship to C.A.T.

723 **Author Contributions**

724 A.C.A. and C.A.T. conceived of the idea. C.A.T. performed all experiments described with assistance from  
725 R.M.M., A.J.F.; F.J.S., K.M.W. and A.M. contributed to experimental design and data interpretation. C.A.T.  
726 performed data processing and analysis with assistance from K.A.T., R.M.M., A.N. and E.G.L. W.Z. and  
727 H.M. performed stroke surgeries. R.W. identified, isolated, and cryopreserved human primary visual cortex  
728 with assistance from C.A.T. C.A.T. and A.C.A. wrote the manuscript with input from all authors.

729 **Competing interests**

730 F.J.S. is an employee of Illumina Inc.

731 **Data and Materials Availability**

732 The sciMAP-ATAC protocol is available on Protocols.io ([dx.doi.org/10.17504/protocols.io.5r4g58w](https://dx.doi.org/10.17504/protocols.io.5r4g58w)).  
733 Analysis was performed using functions contained within the scitools software  
734 ([github.com/adeylab/scitools](https://github.com/adeylab/scitools)).

## 735 **Methods**

### 736 **Mouse brain and human Visp cortex sample preparation**

737 All animal studies were approved by the Oregon Health and Science University Institutional Animal Care and Use  
738 Committee. Male C57Bl/6J mice aged 8 weeks were purchased from Jackson Laboratories for the mouse whole brain  
739 sciATAC, punch dissociation development sciMAP-ATAC, and mouse SSp cortex sciMAP-ATAC experiments.  
740 Animals were sacrificed by carbon dioxide primary euthanasia and cervical dislocation secondary euthanasia. Animals  
741 were immediately decapitated, intact brain tissue was harvested, washed in ice-cold phosphate-buffered saline (PBS;  
742 pH 7.4), submerged in TFM (Cat. TFM-C) within a disposable embedding mold (Cat. EMS 70183). Human Visp cortex  
743 samples were provided by the Oregon Brain Bank 5.5 hours post-mortem and were submerged in TFM. Embedded  
744 mouse whole brain and human Visp cortex samples were flash-frozen in liquid nitrogen cooled isopentane by lowering  
745 the sample into the isopentane bath without submerging within 5 minutes of embedding. Samples were immediately  
746 transferred to dry ice, paraffin wrapped to delay sample dehydration, and stored in an air-tight container at -80 °C.

### 747 **Mouse cerebral ischemia model**

748 Two C57BL/6 9-week-old (P63) female mice were placed under isoflurane anesthesia (5% induction, 1.5%  
749 maintenance) in 30% oxygen-enriched air. Body temperature was maintained at  $37 \pm 0.5^\circ\text{C}$  throughout the procedure.  
750 Middle cerebral artery (MCA) occlusion was performed using a previously described method by Longa *et al.* with slight  
751 modifications<sup>61</sup>. Briefly, a laser Doppler flowmeter (Moore Instruments) probe was affixed over the right parietal bone  
752 overlying the MCA territory to monitor changes in cerebral blood flow. A midline incision was made, the right common  
753 carotid artery (CCA) bifurcation was exposed by gentle dissection, and the external carotid artery (ECA) was  
754 permanently ligated distal to the occipital artery using electrocautery, such that a short ECA stump remained attached  
755 to the bifurcation. The right CCA and internal carotid arteries (ICA) were temporarily closed with reversible slip knots  
756 before an arteriotomy was made in the ECA stump. A silicone-coated 6.0 nylon monofilament was inserted into the  
757 ICA via the arteriotomy and gently advanced to the ICA/MCA bifurcation to occlude CBF to the MCA territory and  
758 confirmed by a laser Doppler signal drop of <30% of baseline. After 60 minutes occlusion, the filament was gently  
759 retracted, the ECA permanently ligated, the slip knot of the CCA removed, and the incision sites sutured closed. The  
760 mice exposed to MCAO were euthanized three days after the MCAO procedure, intact brain tissue harvested, washed  
761 in ice-cold PBS (pH 7.4), submerged in TFM and flash-frozen in liquid nitrogen cooled isopentane. Samples were  
762 paraffin wrapped and stored at -80 °C and intact embedded whole mouse brains were sectioned at the time of  
763 experiment.

### 764 **Sample sectioning**

765 All embedded samples were sectioned in a cryostat (Leica CM3050) at -11°C chuck and chamber temperature and  
766 collected on Superfrost Plus microscope slides (Fisherbrand, Cat. 22-037-246). Sectioning was performed in sets of:  
767 one section at 100-300  $\mu\text{m}$  paired with three sections at 20  $\mu\text{m}$ , to generate sets of four slides consisting of  
768 microbiopsy (1) and histology (3) sections at one section per slide. Slide boxes were sealed with paraffin to prevent  
769 sample dehydration and stored long-term at -80°C.

### 770 **Mouse whole brain coronal section immunohistochemistry and mapping**

771 To determine the mouse brain atlas coordinate of each coronal microbiopsy section, the histological section  
772 immediately adjacent to each microbiopsy section were fixed in 4% PFA for 10 minutes and counter stained using 300  
773  $\mu\text{M}$  DAPI (Thermo Fisher, Cat. D1306) in 1x (pH 7.4) PBS (Thermo Fisher, Cat. 10010023) for 5 minutes. Slides were  
774 rinsed with 1x PBS and mounted in Fluoromount-G (Thermo Fisher, Cat. 00-4958-02). Slides stained for Satb2 were  
775 equilibrated to room temperature and circumscribed with a hydrophobic barrier pen (Invignome, Cat. GPF-VPSA-V).  
776 Sections were washed twice with PBS for 10 minutes then blocked for 1 hour at room temperature in  
777 permeabilization/blocking buffer comprised of PBS with 10% normal goat serum (Jackson ImmunoResearch, Cat.  
778 005-000-121), 1% bovine serum albumin (BSA, Millipore, Cat. 126626), 0.3% Triton X-100 (TX-100, Sigma, Cat.  
779 11332481001), 0.05% Tween-20 (Sigma, Cat. P1379), 0.3 M glycine (Sigma, Cat. G7126) and 0.01% sodium azide  
780 (Sigma, Cat. S2002). During the blocking step, the primary antibody rabbit anti-Satb2 (Abcam Cat. ab92446) was  
781 diluted 1:1000 in a buffer containing PBS, 2% normal goat serum (NGS), 1% BSA, 0.01% TX-100, 0.05% Tween-20,

782 and 0.01% sodium azide. The diluted primary antibody was applied to sections then incubated overnight at 4°C. The  
783 primary antibody was washed from the sections five times with PBS for 5 minutes at room temperature. Secondary  
784 antibody AF488 goat anti-rabbit (Thermo Fisher Cat. A32731) was prepared by diluting 1:1000 in the same buffer  
785 used to dilute primary antibodies. Sections were incubated with the diluted secondary antibody for 1 hour in the dark  
786 at room temperature. Secondary antibodies were washed from the sections three times with PBS for 5 minutes, then  
787 nuclei were counterstained with DAPI for 10 minutes at room temperature. After DAPI staining, sections were washed  
788 an additional two times then glass coverslips were mounted with ProLong Diamond Anti-Fade Mounting Medium  
789 (Thermo Fisher, Cat. P36961). Slides were imaged on a Zeiss ApoTome AxioImager M2 fluorescent upright  
790 microscope and processed using Fiji software<sup>62</sup>. Coronal section images were mapped to the Adult Mouse Allen Brain  
791 Atlas<sup>25</sup> according to anatomical regions.

## 792 **Mouse cerebral ischemia immunohistochemistry and mapping**

793 One of the histological sections corresponding to each microbiopsy section was stained for GFAP to identify the  
794 infarct. Slides were equilibrated to room temperature and circumscribed with a hydrophobic barrier pen. Sections were  
795 washed twice with PBS for 10 minutes then blocked for 1 hour at room temperature in permeabilization/blocking buffer  
796 comprised of PBS with 10% normal donkey serum, 1% bovine serum albumin, and 0.05% Triton X-100. The sections  
797 were next incubated in primary antibody solution comprised of 1:1000 goat anti-GFAP (Abcam, ab53554) and 1:5000  
798 rabbit anti-Iba1 (Fujifilm Wako, NCNP24) diluted in PBS with 1% NGS, 0.1% BSA and 0.005% TX-100 overnight at  
799 4°C. The sections were then washed three times with PBS for 5 minutes each at room temperature and next  
800 incubated for 2 hours at room temperature in secondary antibody solution containing 1:500 donkey anti-goat  
801 conjugated to Alexa Fluor 488 (Invitrogen) and 1:500 donkey anti-rabbit conjugated to Alexa Fluor 555 (Invitrogen)  
802 prepared in the same buffer as the primary antibodies. Following the secondary incubation, sections were washed  
803 three times with PBS for 5 minutes each, counterstained with DAPI for 10 minutes, washed an additional two times for  
804 5 minutes each, then coverslipped with Fluoromount-G. Slides were imaged on a Zeiss AxioScan.Z1 Slide Scanner  
805 and processed using Fiji software. Coronal cerebral ischemia section images were mapped to the Adult Mouse Allen  
806 Brain Atlas<sup>25</sup> according to anatomical regions using the DAPI channel, as described above.

807 Immunohistochemistry fluorescence was quantified using ImageJ (v1.52p). Punch positions were mapped to regions  
808 of interest (ROIs), along with three negative naïve ROIs for each image. Corrected total fluorescence was calculated  
809 as the difference between the integrated density (ROI area \* Mean fluorescence) of an ROI for a given punch and the  
810 average integrated density of negative naïve ROIs. GFAP corrected total fluorescence was plotted using *ggplot*  
811 *geom\_boxplot* and *geom\_smooth*, method *lm* using the *ggplot* function in R (v3.2.1).

## 812 **Mouse whole brain dissociation and nuclei isolation**

813 To evaluate the effect of flash-freezing on chromatin accessibility in mouse brain tissue, we evaluated single-cell  
814 chromatin accessibility profiles from an intact mouse brain in which one hemisphere was flash-frozen as described  
815 previously, and one hemisphere remained unfrozen. Both hemispheres were processed in parallel and underwent  
816 dissociation and nuclear isolation. Tissue was diced in Nuclear Isolation Buffer (NIB: 10mM Tris HCl, pH 7.5 [Fisher,  
817 Cat. T1503 and Fisher, Cat. A144], 10mM NaCl [Fisher, Cat. M-11624], 3mM MgCl<sub>2</sub> [Sigma, Cat. M8226], 0.1%  
818 IGEPAL [v/v; Sigma, I8896], 0.1% Tween-20 [v/v, Sigma, Cat. P7949] and 1x protease inhibitor [Roche, Cat.  
819 11873580001]) in a petri dish on ice using a chilled razor blade. Diced tissue was transferred to 2 mL chilled NIB in a  
820 7 mL Dounce-homogenizer on ice. The tissue was incubated on ice for 5-minutes then homogenized via 10 gentle  
821 strokes of the loose pestle (A) on ice, a 5-minute incubation on ice, then 10 gentle strokes of the tight pestle (B) on  
822 ice. The homogenate was then strained through a 35 µm strainer and centrifuged at 500 rcf for 10 minutes. Samples  
823 were aspirated, resuspended in 5 mL of ice-cold NIB, and nuclei were counted on a hemocytometer. Samples were  
824 diluted to 500 nuclei per 1 µL to facilitate tagmentation reaction assembly at approximately 5,000 nuclei per 10 µL of  
825 NIB.

## 826 **Tissue microbiopsy acquisition and nuclear isolation**

827 Tissue microbiopsies were acquired from 100-300 µm sections. Punches were isolated in four experiments: 1) mouse  
828 dissociation development sciMAP-ATAC (384 punches), 2) mouse SSp cortex sciMAP-ATAC (96 punches), 3) mouse  
829 cerebral ischemia sciMAP-ATAC (240 punches), and 4) human Visp cortex sciMAP-ATAC (192) (for details refer to



830 Extended Data Figure 1). Microbiopsy coronal sections were acclimated to -20° C in a cryostat (Leica CM3050) and  
831 microbiopsy punch tools (EMS, Cat. 57401) were cooled on dry ice prior to punching to prevent warming of tissue.  
832 Microbiopsy punches were acquired according to location identified from section atlas mapping, and frozen  
833 microbiopsies were deposited directly into 100 µL of ice-cold NIB in a 96-well plate. Punch deposition into each well of  
834 the 96-well plate was visually confirmed under a dissecting microscope. To facilitate tissue dissociation and nuclear  
835 isolation, 96-well plates of microbiopsy punches were then gently shaken (80 rpm) while covered for 1 hour on ice.  
836 We then tested mechanical dissociation by varying the number of triturations performed via multi-channel pipette per  
837 well (punch dissociation development sciMAP-ATAC). We found the following averaged metrics across the four  
838 dissociation methods: 15 triturations (26 cells per punch, 5,679 unique passing reads per cell, 0.844 FRIs), 30  
839 triturations (35 cells per punch, 7,189 unique passing reads per cell, 0.835 FRIs), 60 triturations (28 cells per punch,  
840 7,611 unique passing reads per cell, 0.827 FRIs), and 100 triturations (8 cells per punch, 7,611 unique passing reads  
841 per cell, 0.821 FRIs). Given that 60 trituration mechanical dissociation yielded the highest number of cells per punch,  
842 with otherwise comparable metrics, we proceeded with 60 triturations for all future experiments. Post-mechanical  
843 dissociation, sample plates were then centrifuged at 500 rcf for 10 minutes. While nuclear pellets were not visible, we  
844 found that aspiration of 90 µL of supernatant and resuspension in an added 30 µL of NIB results in a final isolated  
845 nuclear volume of 40 µL with approximately 15,000 nuclei per well (for microbiopsy punching conditions: 200 µm  
846 section, 250 µm diameter microbiopsy punch used in the human VISp and mouse cerebral ischemia preparations).  
847 Nuclei were split across four 96-well plates such that nuclei were aliquoted to 10 µL, or approximately 3,750 nuclei per  
848 well. This enabled 4 independent indexed transposase complexes to be utilized for each individual punch, or 384  
849 uniquely indexed transposition reactions in one experiment. To calculate the approximate resolution for each  
850 preparation, we took the cubed root of the cylindrical volume.

#### 851 **Location indexing via tagmentation**

852 Transposase catalyzed excision of the chromatin accessible regions via tagmentation results in the addition of unique  
853 molecular identifiers (indexes) for each tagmentation reaction. To encode microbiopsy punch location into library  
854 molecules, we recorded the corresponding tagmentation well within each 96-well plate to the user-identified  
855 microbiopsy punch location. The incorporation of location information is therefore inherently encoded by the first tier of  
856 indexing in our established sci-ATAC-seq method. Tagmentation reactions were assembled at 10 µL of isolated nuclei  
857 at 500 nuclei per 1 µL, 10 µL 2x tagmentation buffer (Illumina, Cat. FC-121-1031), and 1 µL of 8 µM loaded indexed  
858 transposase was added per well (See Picelli et al. for loading protocol)<sup>63</sup>. Each assembled 96-well plate of  
859 tagmentation reactions was incubated at 55°C for 15 minutes. For the mouse whole brain sci-ATAC-seq preparation  
860 on fresh and frozen tissue as well as the sciMAP-ATAC preparations, four 96-well plates of tagmentation were used  
861 (384 uniquely indexed tagmentation reactions). For whole brain sci-ATAC-seq preparation on fresh and frozen tissue  
862 experiment, tagmentation wells were pooled separately for fresh and frozen hemisphere samples. For the microbiopsy  
863 punch-derived experiments, all reactions were pooled post-tagmentation.

#### 864 **Combinatorial indexing**

865 To lyse nuclei and release bound transposase, PCR plates are prepared with protease buffer (PB), primers, and  
866 sparsely sorted nuclei and then incubated. Post-denaturation, the remaining PCR reagents are added and  
867 incorporation of the PCR primers results in incorporation of the secondary index for single combinatorial indexing. For  
868 the denaturation step, 96-well PCR plates of 8.5 µL PB (30 mM Tris HCl, pH 7.5, 2 mM EDTA [Ambion, Cat. AM9261,  
869 20 mM KCl [Fisher, Cat. P217 and Fisher, Cat. A144], 0.2% Triton X-100 [v/v], 500 µg/mL serine protease [Fisher,  
870 Cat. NC9221823], 1 µL 10 mM indexed i5, and 1 µL indexed i7 per well were prepared. Pooled tagmented nuclei were  
871 stained by adding 3 µL of DAPI (5mg/mL) per 1 mL of sample. Each sample was then FACS sorted using a Sony  
872 SH800 FACS machine at 22 events per well per 96-well Tn5 plate (e.g. 88 for 384 indexes) into prepared 96-well  
873 plate(s). Event numbers were selected based on the expected success rate of events as actual cells for a given target  
874 cell doublet rate (see 'Doublet rate estimations' section below). Across the sciMAP-ATAC experiments, four PCR  
875 plates (384 uniquely indexed wells) were utilized for the initial punch-derived sci-ATAC-seq preparation from whole  
876 brain-derived punches, two PCR plates (192 uniquely indexed wells) were used for the mouse SSp cortex experiment,  
877 one full and one partial plate (128 uniquely indexed wells) for the human VISp experiment, 2 plates (192 uniquely  
878 indexed wells) for the mouse cerebral ischemia experiment, and finally two PCR plates (192 uniquely indexed wells)  
879 were utilized for the non-spatial whole brain sci-ATAC-seq preparation on fresh and frozen tissue. Transposase

880 denaturation was performed by sealing each sorted plate and incubating at 55°C for 15 minutes. Plates were  
881 immediately transferred to ice post-incubation and 12 µL of PCR mix (7.5 µL NPM [Illumina Inc. Cat FC-131-1096], 4  
882 µL nuclease-free water, 0.5 µL 100x SYBR Green) was added to each well. For each experiment, plates were then  
883 sealed and PCR amplified on a BioRad CFX real-time cycler using the following protocol: 72°C for 5:00, 98°C for  
884 0:30, Cycles of [98°C for 0:10, 63°C for 0:30, 72°C for 1:00, plate read, 72°C for 0:10] for 18-22 cycles. PCR plates  
885 were transferred to 4°C once all wells reached mid-exponential amplification on average. Each PCR plate is then  
886 pooled at 10 µL per well and DNA libraries are isolated using a QIAquick PCR Purification column. Each pooled PCR  
887 plate library is then quantified using a Qubit 2.0 fluorimeter, diluted to 4 ng/µL with nuclease-free water, and  
888 quantification of library size performed on Agilent Bioanalyzer using a dsDNA high sensitivity chip. Libraries were then  
889 sequenced on a NextSeq™ 500 sequencer (Illumina Inc.) loaded with custom primers and chemistry, as previously  
890 described<sup>19</sup>.

## 891 **Doublet rate estimations**

892 An important factor in single-cell studies is the expected doublet or collision rate. This manifests in droplet-based  
893 platforms as two cells being encapsulated within the same droplet, thus having the same cell barcode for their  
894 genomic information. This is tunable by the number of cells or nuclei loaded onto the instrument, with typical doublet  
895 rates targeted to be at or below 5%. This is also true for combinatorial indexing workflows, where doublets are present  
896 in the form of two cells or nuclei with the same level 1 index – which is the transposase index for ATAC – that end up  
897 in the same level 2 indexing well (i.e., the PCR well). This results in an identical pair of indexes for the two cells. This  
898 rate, like with droplet methods, is also tunable by altering the number of indexed cells or nuclei that are deposited into  
899 each well, with a typical experiment targeting at or below a 5% doublet rate. This rate is approximated by leveraging  
900 the “birthday problem” formulation in statistics, where the transposase index space (days in the year) and number of  
901 indexed nuclei per well (number of people at each table) are taken into account. These predictions assume that there  
902 is complete mixing of nuclei prior to distribution and that the distribution is unbiased, which are reasonable given the  
903 single nuclei suspension and use of flow sorting for the distribution process, and hold up when compared to empirical  
904 data produced by multi-species cell mixing experiments<sup>19,57,64</sup> (i.e. barnyard experiments, typically mixing human and  
905 mouse cells). However, in the case of sciMAP-ATAC, nuclei are directly isolated and then indexed within the same  
906 well, making a true barnyard experiment not feasible. Any experiment that would use tissue punches from two  
907 different species into different wells would not capture doublets because of the *de facto* unique indexes for each  
908 species imparted by the different wells for the first level of indexing. We therefore assumed that the assumptions that  
909 have been made and tested for standard sci-ATAC-seq and related combinatorial technologies also apply to sciMAP-  
910 ATAC, as the novel components of the workflow are in the processing prior to the combinatorial indexing stages.

911 With our set of 384 unique transposase indexes and the sorting of 88 nuclei per well across experiments, this would  
912 result in a doublet rate (i.e. two nuclei of the same transposase index ending up in the same PCR well) of 10.5% if the  
913 yield of sorted nuclei was perfect. However, we favor speed over precise quantification during the sorting step, as the  
914 actual number of sorted cells does not matter as long as it ends up being below the target number. We have found  
915 that using our fast sorting workflow, of the target number of events that are sorted, only between 25 and 50% are true  
916 nuclei. The rest of the events are empty droplets. We also note that these droplets do not contain ambient chromatin  
917 based on human-mouse mixing experiments<sup>19</sup>. Using the high end of the approximate 50% true nuclei yield, the  
918 expected doublet rate is 5.4%, in line with other commercially available single-cell platforms. When factoring in the  
919 actual yield with respect to single-cell profiles produced, the doublet rate is even lower. For example, the punch  
920 dissociation development sciMAP-ATAC preparation produced 8,012 single-cell profiles over 384 unique indexed  
921 transposition wells, for an average of just under 21 cells produced per well out of the 88 events that were sorted – a  
922 23.7% yield. The final expected doublet rate is therefore most accurately calculated according to 21 indexed nuclei  
923 produced per well with a transposase index space of 384 for a doublet rate of 2.5%, which is well within the accepted  
924 range.

## 925 **Sequence data processing**

926 Data analysis and plotting were performed primarily using the ‘scitools’ software ([github.com/adeylab/scitools](https://github.com/adeylab/scitools))<sup>22</sup>,  
927 which includes wrappers for numerous external tools. Raw sequence reads had their index combinations matched to  
928 a whitelist of expected indexed using ‘scitools fastq-dump’ which allows for a hamming distance of two and produces

929 error-corrected fastq files. These were then aligned to mouse or human reference genome (mm10 or hg38) via bwa  
930 mem (v0.7.15-r1140)<sup>65</sup> and sorted using 'scitools align'. PCR duplicate removal and filtering for quality 10 aligned  
931 autosomal and chromosome X reads (*i.e.* excluding mitochondrial, chromosome Y, and unanchored contigs) was  
932 performed using 'scitools rmdup' using default parameters and plotted using 'scitools plot-complexity'. Projections of  
933 passing reads given increased sequencing depth was performed using 'scitools bam-project' on the pre-duplicate  
934 removed bam file, which generates a model for every single cell based on sampling reads and calculating the passing  
935 read percentage that empirically falls within 2% accuracy<sup>19</sup>. Bam files were then filtered to only contain cell barcodes  
936 that contained a minimum of 1,000 passing reads and a percent unique reads less than 80 (any overly complex cell  
937 libraries may be doublets and were therefore excluded). For the human VISp dataset, cells were also filtered to have  
938 a TSS enrichment (per cell calculation) of 2 (see section "Quality metric calculations" below).

### 939 **Chromatin accessibility analysis**

940 The filtered bam file was used for chromatin accessibility peak calling for each of the five experiments individually as  
941 well as on a combined bam file from the mouse whole brain sciATAC-seq, mouse punch dissociation development  
942 sciMAP-ATAC, and mouse SSp cortex sciMAP-ATAC experiments for the combined dataset analysis. Peak calling  
943 was run using the wrapper function 'scitools callpeak', which utilized macs2 (v2.1.1.20160309) for peak calling and  
944 then filtering and peak extension to 500bp<sup>66</sup>. Called peaks from mouse whole brain sciATAC-seq, mouse punch  
945 dissociation development sciMAP-ATAC, and mouse SSp cortex sciMAP-ATAC datasets were merged to generate a  
946 union peak set that was used to compare sciATAC-seq and sciMAP-ATAC clustering. Peak bed files and filtered bam  
947 files were then used to construct counts matrix of cells  $\times$  peaks. Latent Dirichlet Allocation using the package  
948 cisTopic<sup>67</sup> was performed using the scitools wrapper function 'scitools cistopic'. Topic enrichments for region type  
949 annotations (Extended Data Figure 4g) were annotated using cisTopic function *annotateRegions*, using the  
950 Bioconductor package *TxDb.Hsapiens.UCSC.mm10.knownGene* and annotation database *org.Mm.eg.db*. The topic  
951 by annotation heatmap was plotted using cisTopic function *signaturesHeatmap*. The cells  $\times$  topics matrix was  
952 biclustered and plotted using 'scitools matrix-biclust', which utilizes the *Heatmap* function in the *ComplexHeatmap*  
953 package in R (v1.20.0)<sup>68</sup>. Two-dimensional visualization was performed using UMAP via 'scitools umap' and plotted  
954 using 'scitools plot-dims'. Visualization of topic weights on the UMAP coordinates was performed using 'scitools plot-  
955 dims' with -M as the cells  $\times$  topics matrix. Clustering was performed on the cells  $\times$  topics matrix using the R package  
956 *Rphenograph*, which employs Louvain clustering and was executed using the wrapper function 'scitools matrix-pg'  
957 (v0.99.1)<sup>69</sup>. In addition to topic analyses, we utilized ChromVAR<sup>50</sup> to assess the global motif accessibility profiles of  
958 cells using the wrapper function 'scitools chromvar' on the bam file with added read group tags using 'scitools addrg'.  
959 Boxplots illustrating TF motif enrichment per cell were generated using values from the *Chromvar* *deviations\_scores*  
960 matrix and plotted using *geom\_boxplot* from the package *ggplot* in R, where lower and upper hinges indicate first and  
961 third quartiles, center line indicates median, upper and lower whiskers indicate 1.5 times the inner quartile range  
962 (IQR). Data points beyond the end of the whiskers are called "outlying" points and are plotted individually. All boxplot  
963 comparison significance calculations were performed using the *wilcox.test* function, indicating *paired=FALSE* and  
964 *p.adjust.method* set to Bonferroni-Holm correction in R (v0.3.0).

### 965 **Quality metric calculations**

966 To generate tagmentation site density plots centered around transcription start sites (TSSs), we first subset filtered  
967 experiment bam files into respective annotations. We used the alignment position (chromosome and start site) for  
968 each read to generate a bed file that was then fed into the BEDOPS closest-feature command mapped the distance  
969 between all read start sites and transcription start sites (v 2.4.36, ref<sup>70</sup>). From this, we collapsed distances into a  
970 counts table respective of experiment and annotation and generated percentage of read start site distances within  
971 each counts table. We plotted these data using R (v 3.6.1) and *ggplot2* (v 3.3.2) *geom\_line* function (default  
972 parameters) subset to 2000 base pairs around the start site to visualize enrichment. TSS enrichment values were  
973 calculated for each experimental condition using the method established by the ENCODE project  
974 (<https://www.encodeproject.org/data-standards/terms/enrichment>), whereby the aggregate distribution of reads  $\pm$ 1,000  
975 bp centered on the set of TSSs is then used to generate 100 bp windows at the flanks of the distribution as the  
976 background and then through the distribution, where the maximum window centered on the TSS is used to calculate  
977 the fold enrichment over the outer flanking windows. The fraction of reads in a defined read set (FRiS) was used as  
978 an alternative to the fraction of reads in peaks for two major reasons. The first is that FRiP is highly dependent on the

979 number of peaks that are called, which is, in turn, highly dependent on a) the number of cells profiled, and b) the  
980 depth of sequencing. One can increase FRiP values by sequencing a library more deeply or profiling larger numbers  
981 of cells at the same depth without reflecting any difference in underlying data quality. Second, peak calling on a  
982 population of cells favors peaks in high abundance cell types, as they make up more of the data going into the peak  
983 calling. Therefore, cells of a cell type that is lower abundance will have fewer peaks called that are specifically  
984 associated with that cell type owing to the dominance of signal by the more abundant cell type and consequently  
985 reducing the FRiP of those cells. Using FRiS instead largely avoids the challenges associated with peak calling by  
986 leveraging a comprehensive reference dataset. For the mouse FRiS calculations, we aggregated peaks that are  
987 available from mouse bulk ATAC-seq and DNase hypersensitivity experiments provided by the ENCODE project,  
988 followed by peak collapsing, resulting in 2,377,227 total peaks averaging 744.9 bp. For the human dataset, we used a  
989 human reference dataset for DNase hypersensitivity<sup>28</sup> that contains 3,591,898 loci defined as TF footprints with an  
990 average size of 203.9 bp leading to the lower FRiS values when compared to the aggregate mouse ATAC-seq peak  
991 dataset.

## 992 **Cell type identification**

993 The identified clusters were assigned to their respective cell type by examining the chromatin accessibility profile of  
994 marker genes that correspond to known cell types. Gene regions were plotted using 'scitools plot-reads' using the  
995 filtered bam file and genome track plots were generated using *CoveragePlots* from the analysis suite of tools, *Signac*  
996 (v0.2.5, <https://github.com/timoast/signac>). Additional support for identified cell types was performed by assessing the  
997 chromVAR results for global motif accessibility. Marker genes used for cell type identification included: *Gfap*, *Glul*, and  
998 *Agt* for astrocytes, *Col19a1* for all neuronal cell types, *Gad1*, *Gad2*, *Pvalb*, *Dlx1*, and *Dlx2* for GABAergic neurons,  
999 *Slc17a7*, *Drd1*, *Drd2*, *Bcl11b* (*Ctip2*) and *Ppp1r1b* for GABAergic medium spiny neurons (MSNs), also referred to as  
1000 spiny projection neurons (SPNs), *C1qa*, *C1qc*, *Cx3cr1* for microglia, *Mrc1* for macrophages within the microglia  
1001 cluster, *Kdr* and *Flt1* for endothelia, *Olig1* for al oligodendrocyte cell types, *Top2a* and *Cspg4* (*NG2*) for OPCs, *Fyn*  
1002 and *Prox1* for newly formed oligodendrocytes, and *Mobp*, *Mog*, *Cldn11* and *Prox1* for mature myelinating  
1003 oligodendrocytes.

## 1004 **Gene ontology enrichment analysis**

1005 Gene ontology enrichment analysis was performed for the genomic regions defined within Topic 30, the topic enriched  
1006 in ischemia specific cells. Single nearest genes to Topic 30 regions were identified using GREAT (v4.0.4) for  
1007 reference genome mm10<sup>71</sup>. Gene ontology term statistical overrepresentation for GO biological processes was  
1008 calculated using Panther (v14) binomial test with false discovery rate (FDR) correction for overrepresentation of Topic  
1009 30 genomic regions in comparison to all mouse (mm10) genes. Data were plotted using *ggplot* plotting function  
1010 *geom\_barplot* in R (v3.2.1) with height corresponding to log<sub>2</sub> GO term fold enrichment and colored by GO term -log<sub>10</sub>  
1011 FDR Q-value.

## 1012 **Transcription factor and site enrichment through trajectories**

1013 ChromVAR analysis (described previously) was performed on all cells derived from ischemia mouse models, including  
1014 the ischemic (stroke) hemisphere and contralateral (contra) hemisphere. For the cells x TF motif enrichment (TME)  
1015 matrix, cells were annotated by the punch they were derived from, and a linear regression of TME as a function of  
1016 punch location for each cell using the base function *lm* in R (v3.6.1). Slopes of the linear model for the ischemic and  
1017 contralateral hemispheres were defined as the coefficient of the fit. The statistical significance of the interaction  
1018 between TME over space and disease condition (stroke versus contralateral hemisphere) was calculated by  
1019 performing an analysis of variance (ANOVA, *anova* base R v3.6.1) on the interaction of hemisphere on the linear  
1020 regression defined by TF motif enrichment as a function of punch position (TME~Punch\*Hemisphere<sub>(Stroke/Contra)</sub>), and  
1021 slopes were compared using *lsmeans::lstrends* (v2.30-0). Slopes were compared between the stroke and  
1022 contralateral hemispheres by taking the difference between the slopes ( $\Delta$  Slope=slope<sub>stroke</sub>-slope<sub>contra</sub>). The change in  
1023 slope was z-scored to center and scale TME difference, where z-score  $\Delta$  Slope is equal to two standard deviations  
1024 from the mean. Volcano plot of -Log<sub>10</sub> P-value by  $\Delta$  Slope was generated using the package *EnhancedVolcano*  
1025 (v1.4.0) in R<sup>72</sup>. Line plots vignettes were generated by plotting volcano plot data using *ggplot* plotting function  
1026 *geom\_smooth*, method *lm* (v3.2.1). Heatmaps illustrating cell-type specific TME over space were generated by

1027 subsetting ischemia mouse model cells by cell type, and plotting TME by punch, compared between stroke and  
1028 contralateral hemispheres using package ComplexHeatmap (v2.0.0) in R.

1029 Analysis of putative regulatory elements was performed by assessing the ATAC peak probabilistic weight per cell  
1030 (*cisTopic* predictive distribution) across cells derived from punches taken from the infarct core to infarct border axis  
1031 (punch positions 5 to 8) in the stroke and contralateral hemispheres, aggregated across all MCAO mice. This was  
1032 performed similarly to TF motif enrichment described above, where ATAC peak probability per cell was averaged by  
1033 punch position (punch positions 5-8). ATAC peak probability along the 5-8 axis was fit to a linear model and the slope  
1034 in the stroke hemisphere was compared to the slope in the contralateral hemisphere in order to generate significance  
1035 and delta-slope values. We found that 3,852 peaks out of 104,773 total peaks (4.8%) vary significantly across the 5-8  
1036 axis in MCAO stroke hemispheres in contrast to the contralateral hemispheres. In order to identify putative regulatory  
1037 elements which are associated with the progressive gradient of glial reactivity from the infarct core to the infarct  
1038 border in stroke hemispheres, we subset our spatially significant peak set to those which uniformly increase or  
1039 decrease along the 5-8 axis in stroke hemispheres. We found 72 sites which uniformly increase with increasing  
1040 proximity to the infarct border, and no sites which uniformly decrease. We report all 3,852 spatially significant peaks  
1041 as a reference for future MCAO regulatory element studies and denote the 72 uniformly increasing sites.

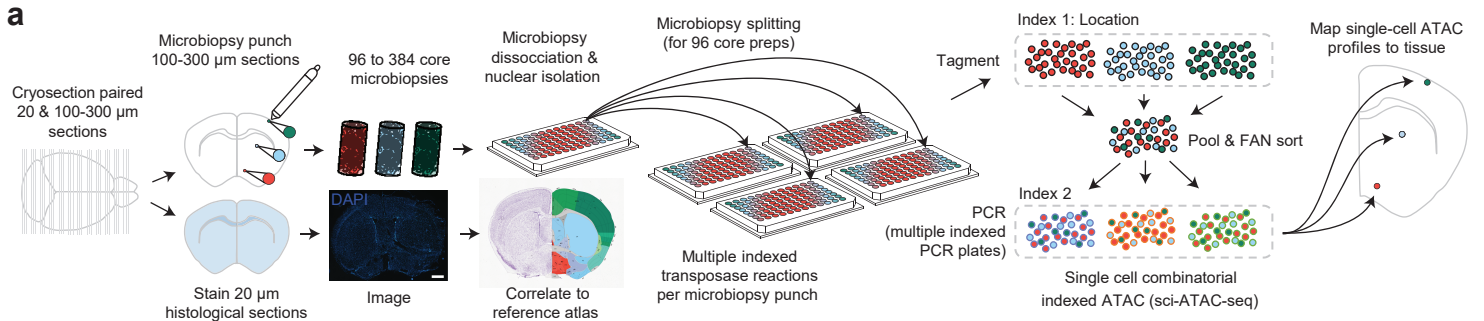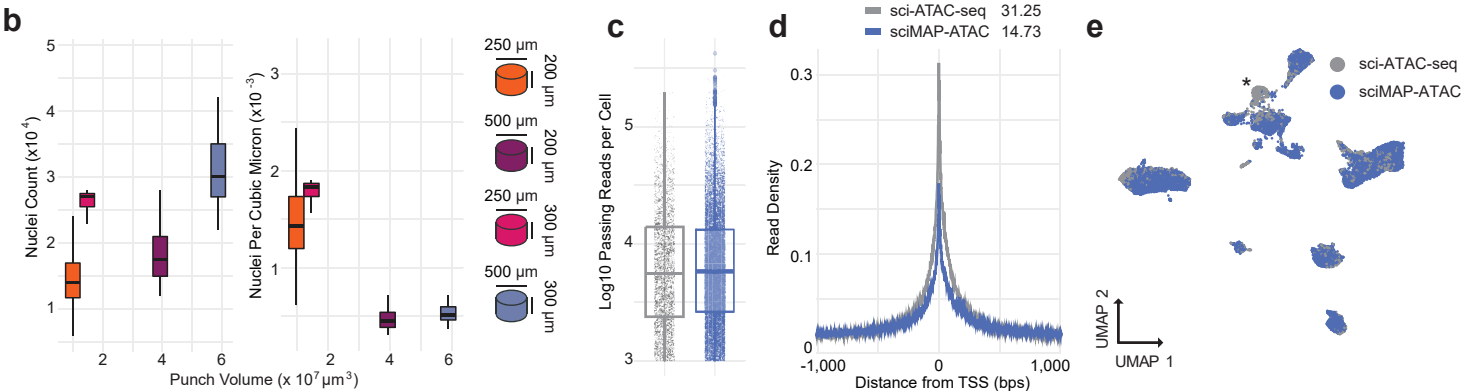

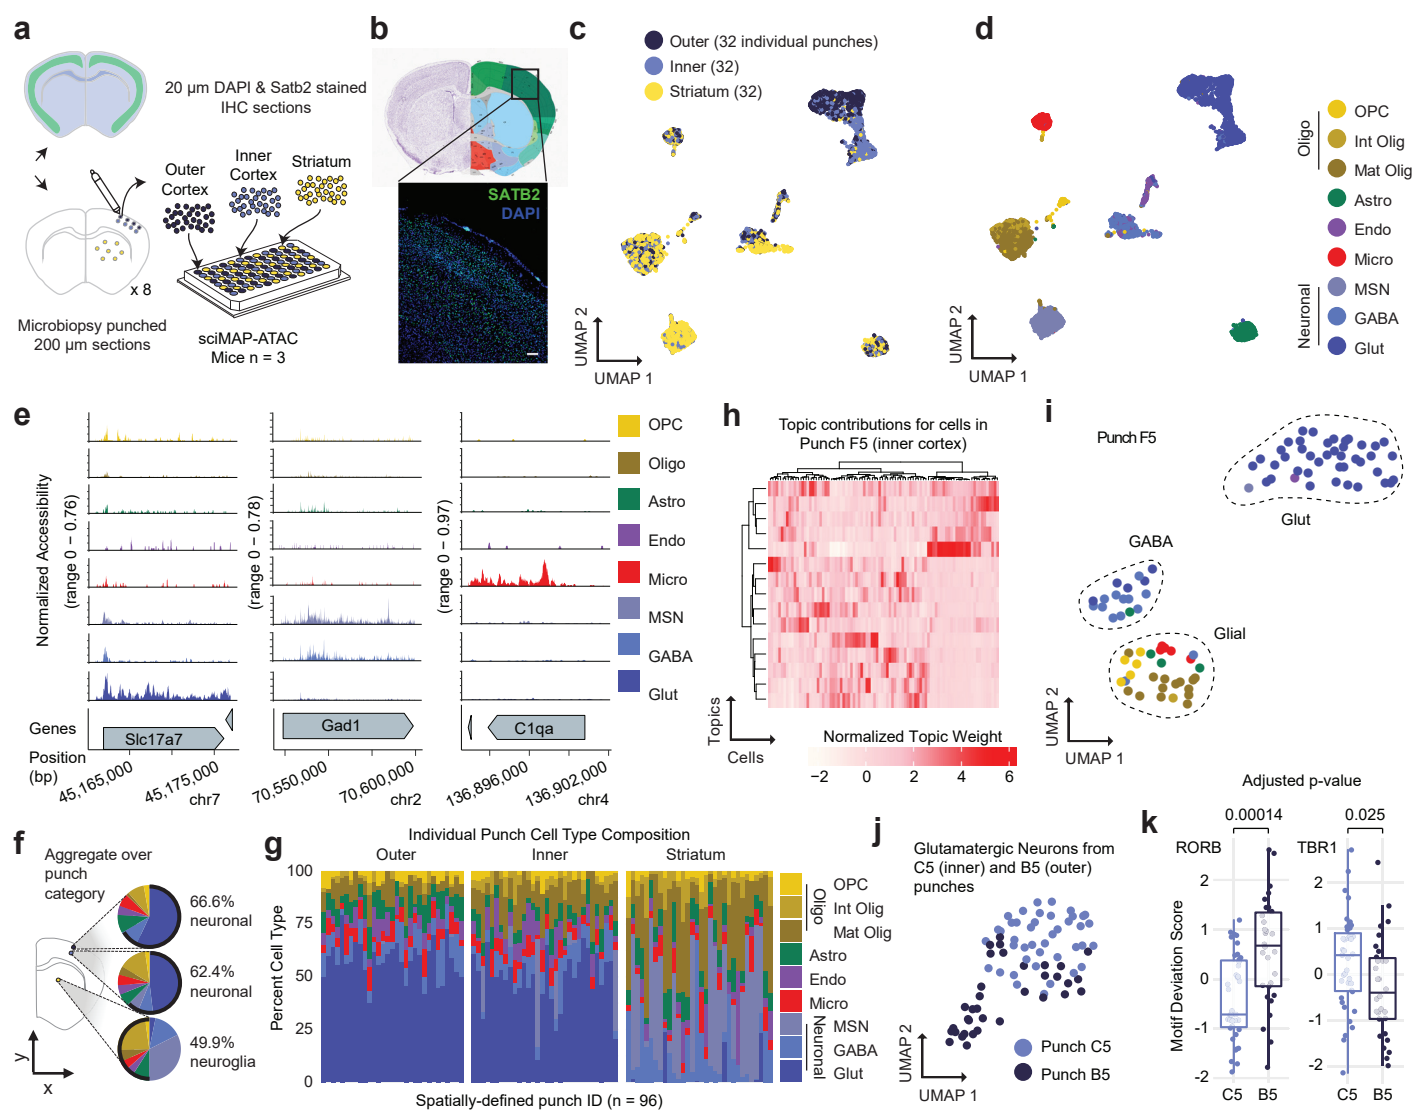

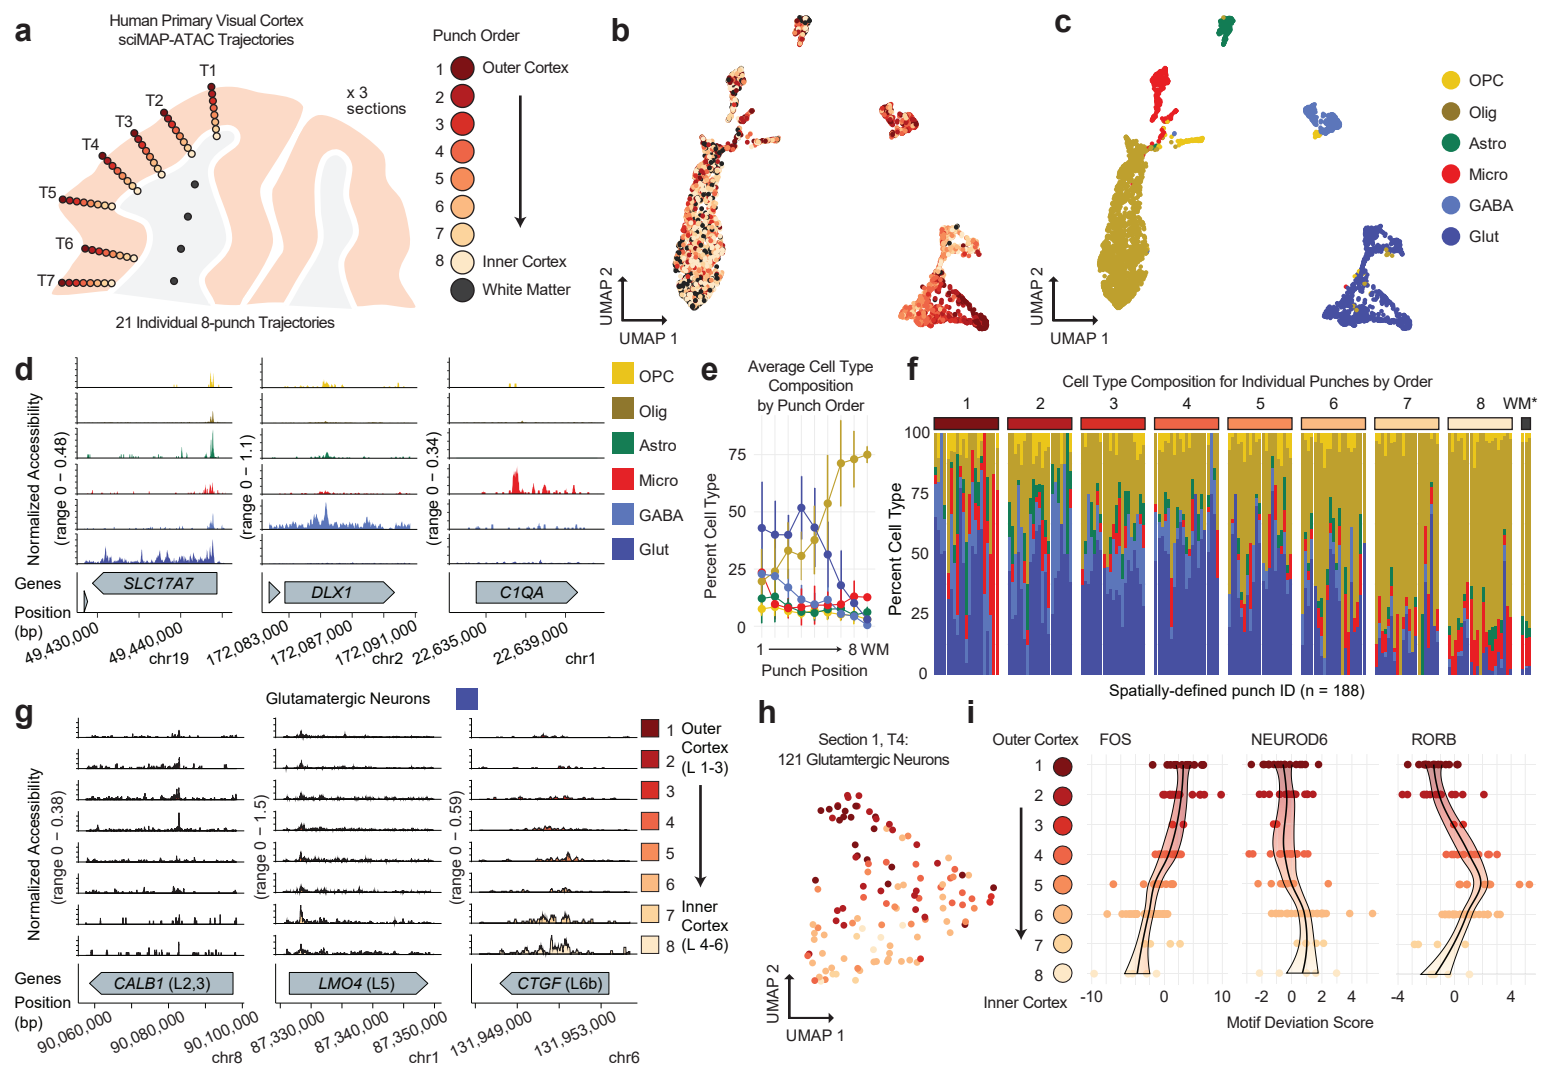



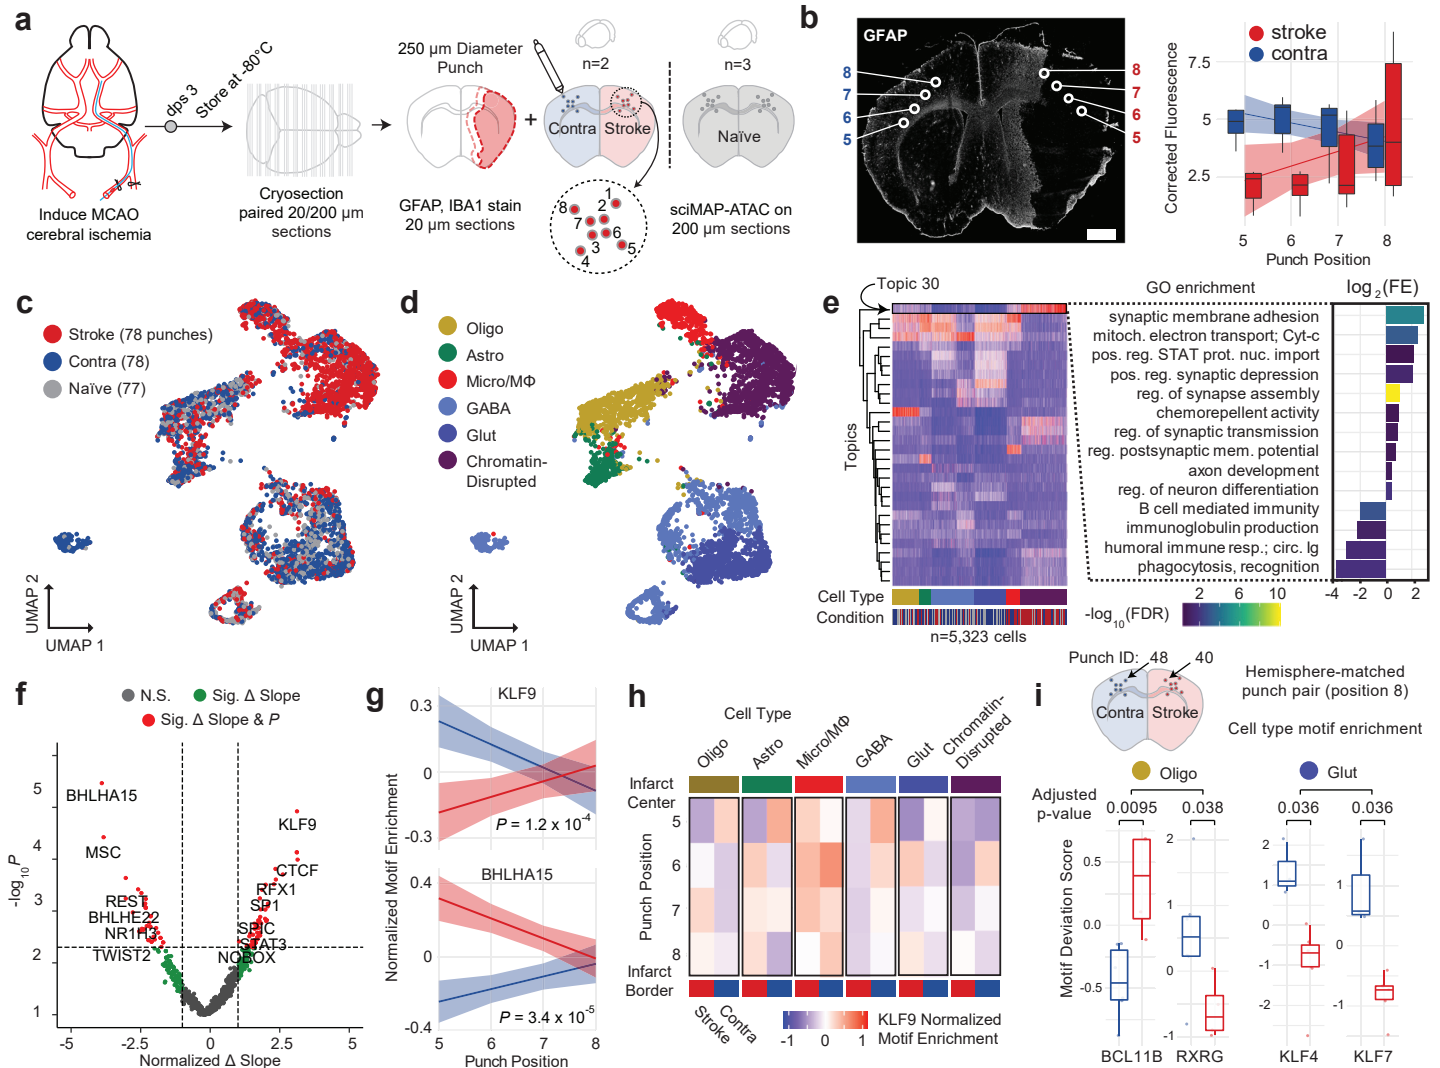

**a** Whole brain sci-ATAC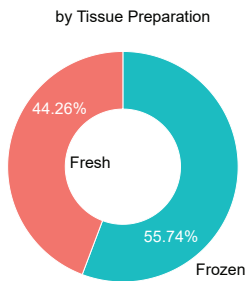**b** Punch Dissociation Development sciMAP-ATAC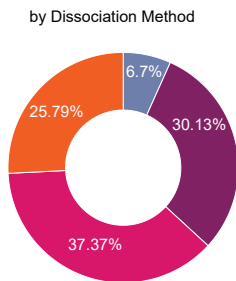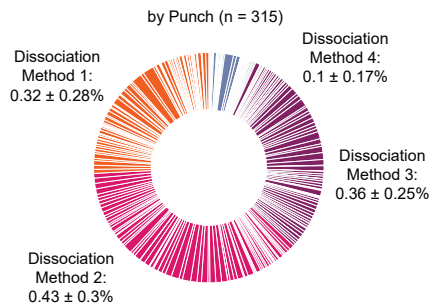**c** SSp Cortex sciMAP-ATAC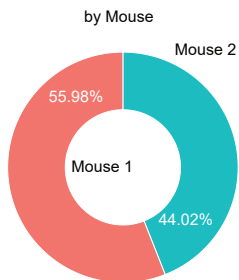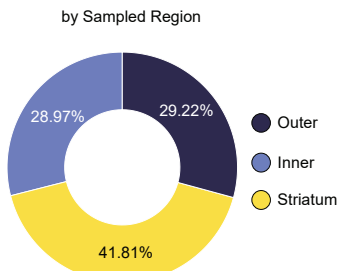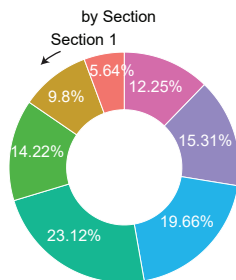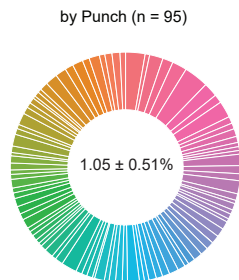**d** Human Visp cortex study sciMAP-ATAC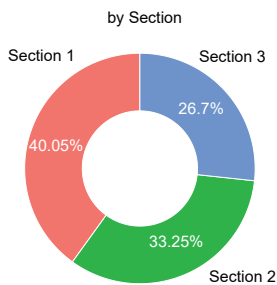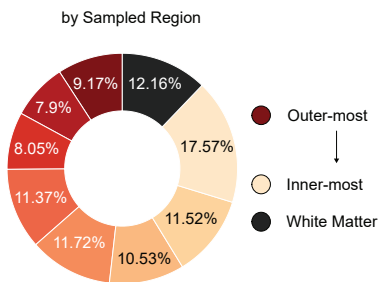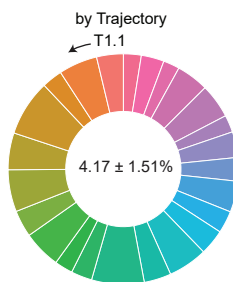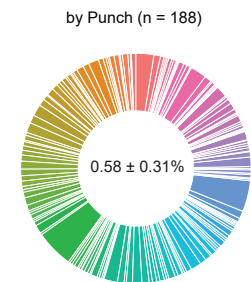**e** Cerebral ischemia study sciMAP-ATAC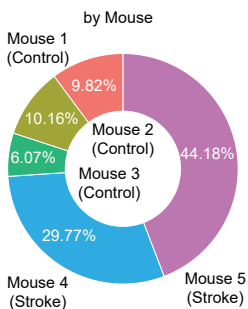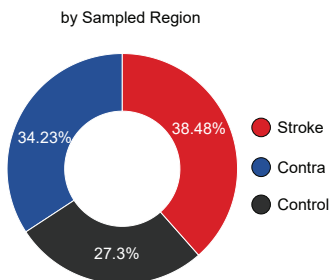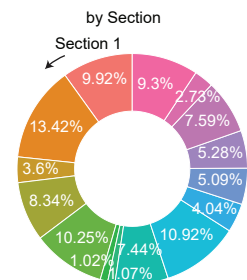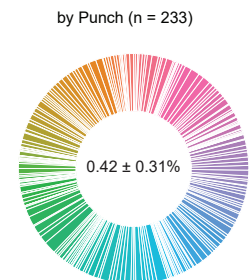

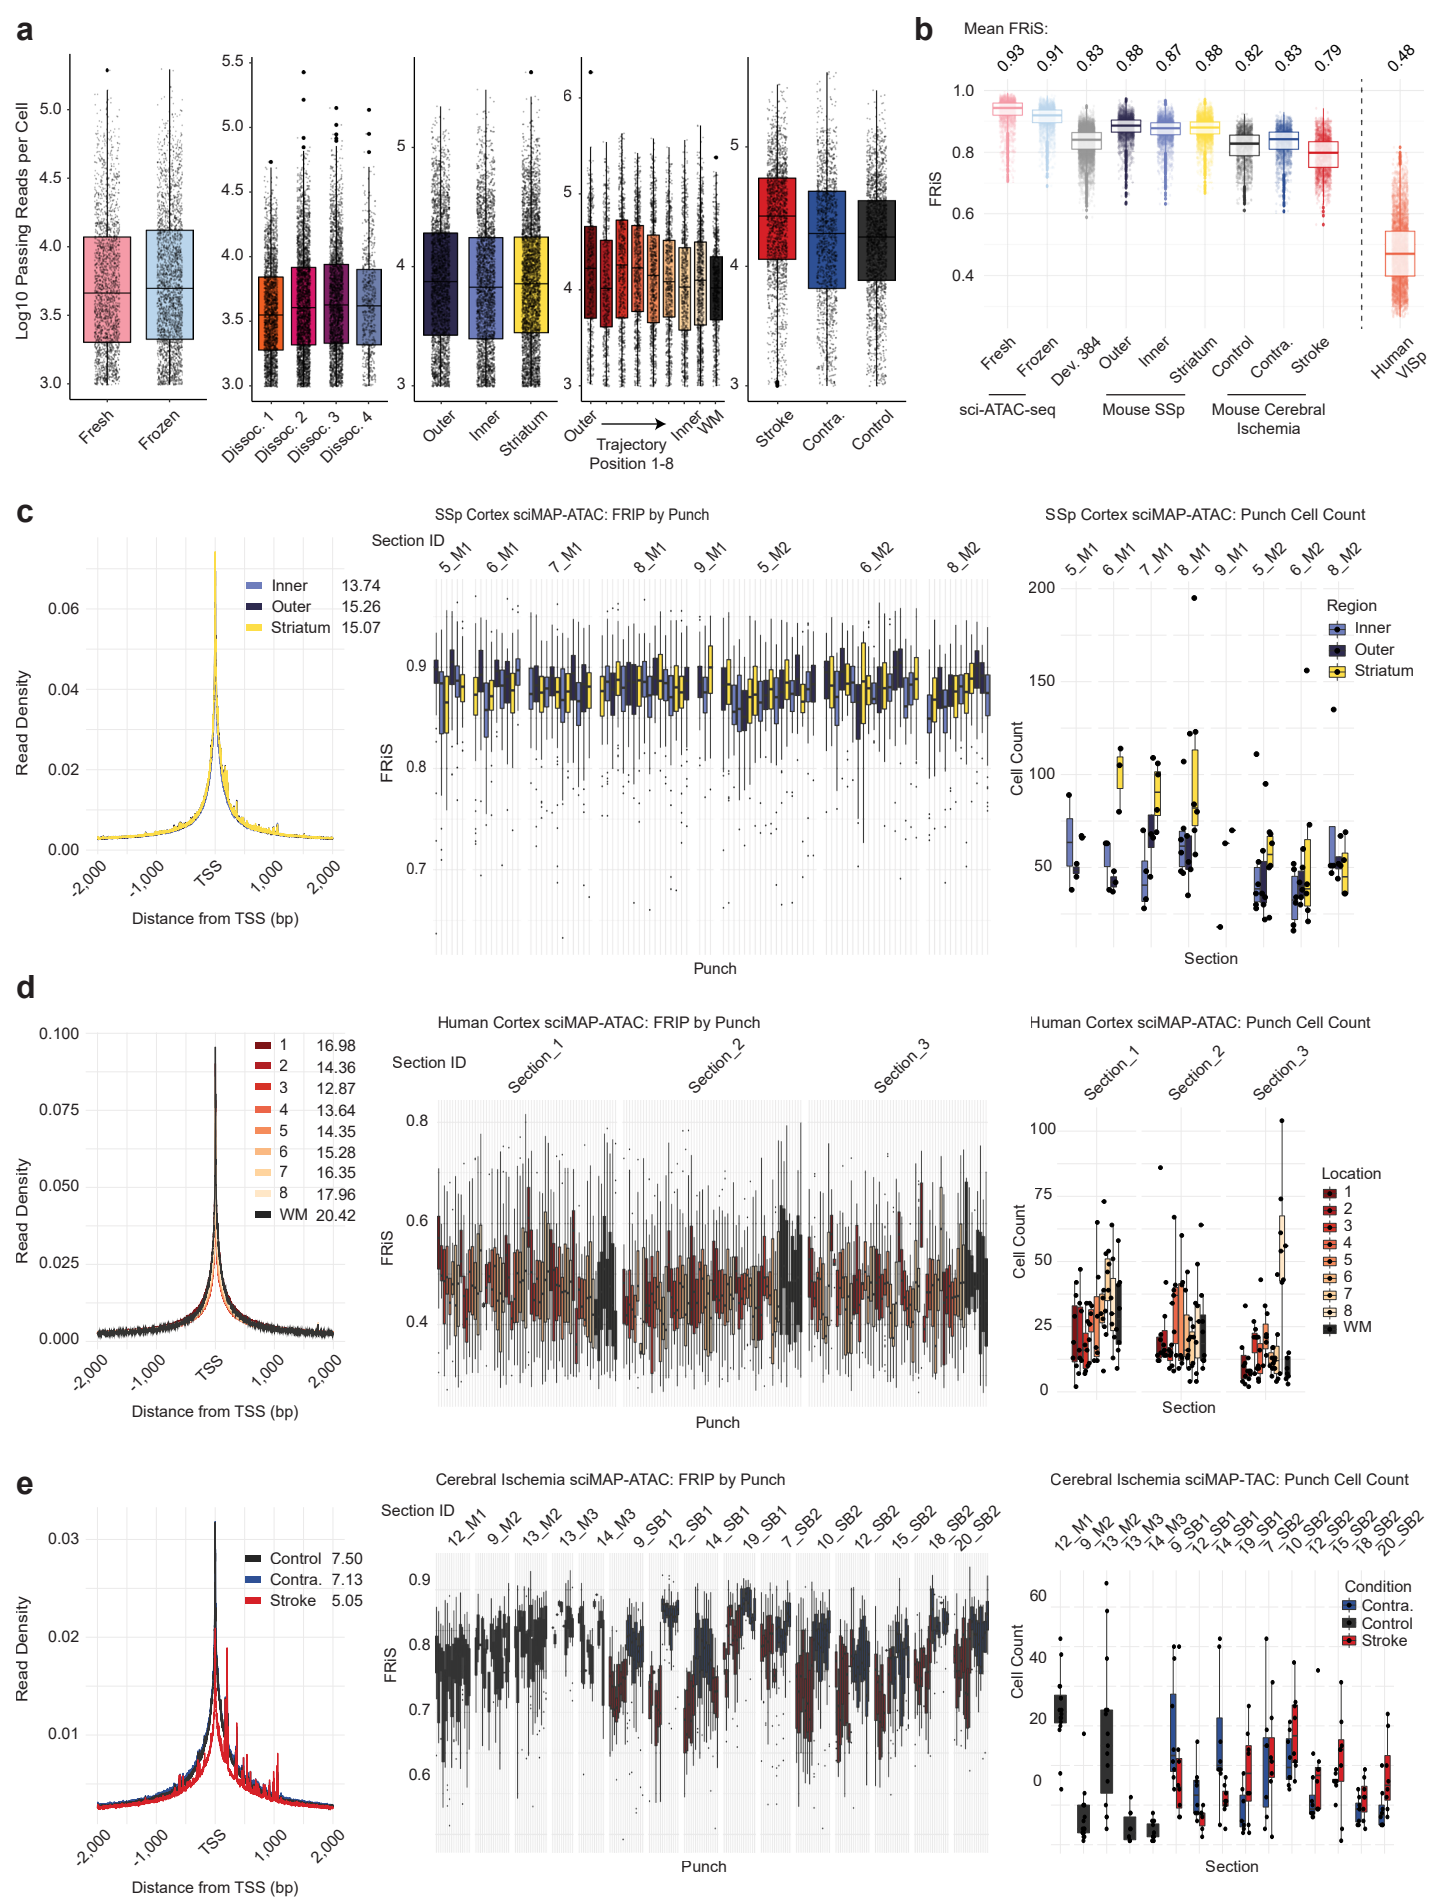

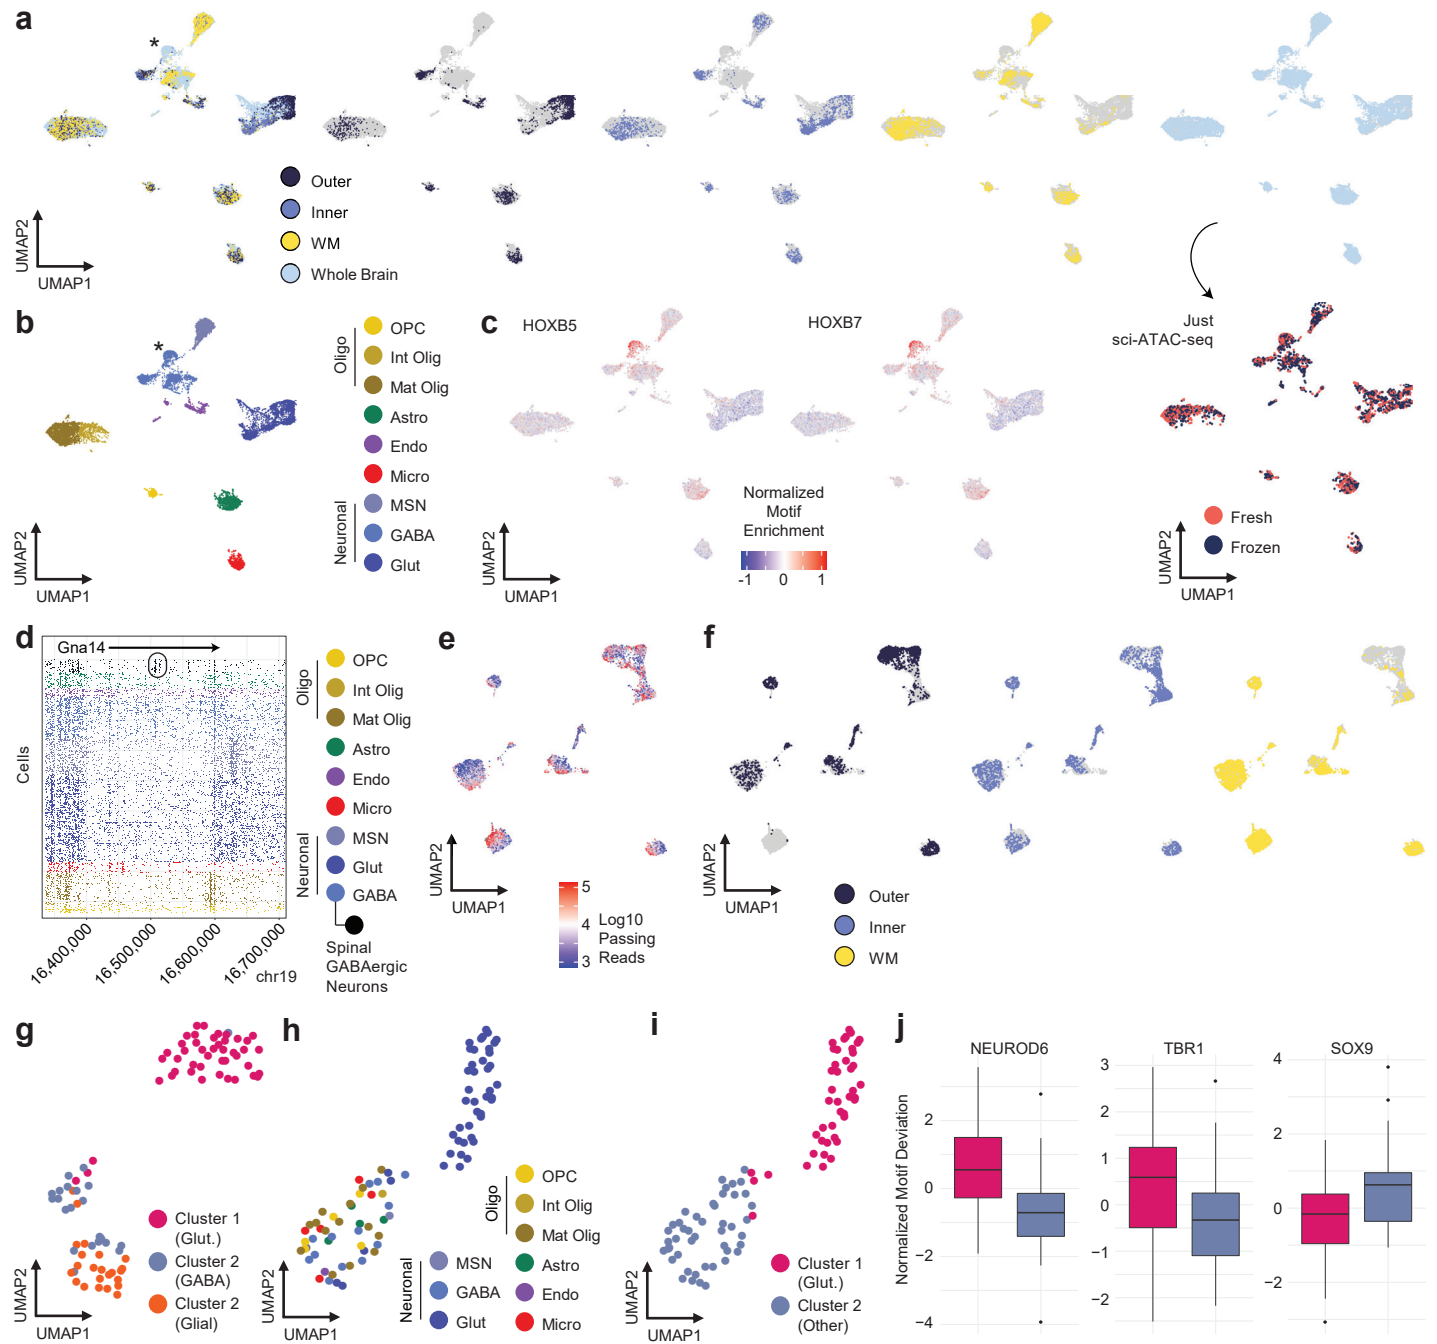

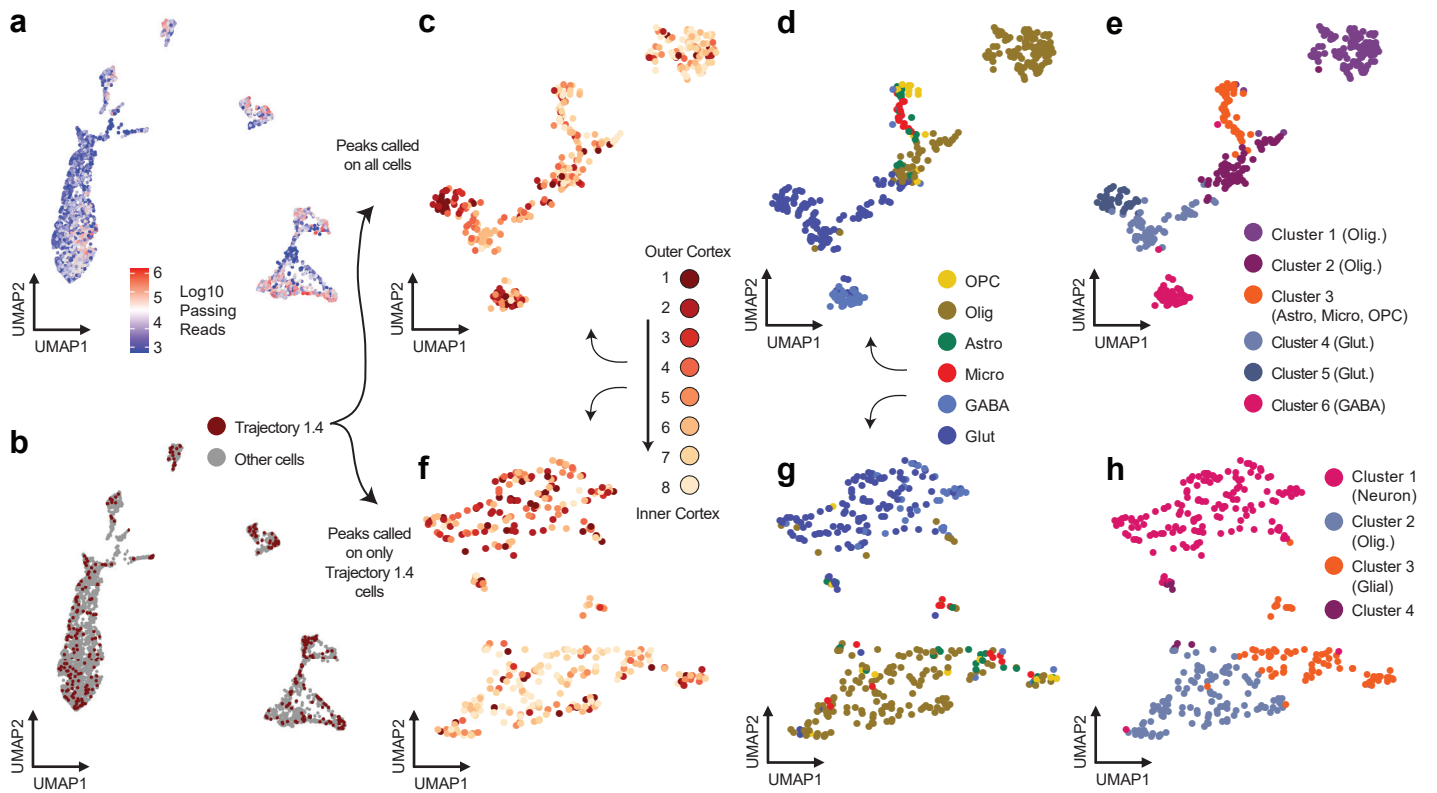

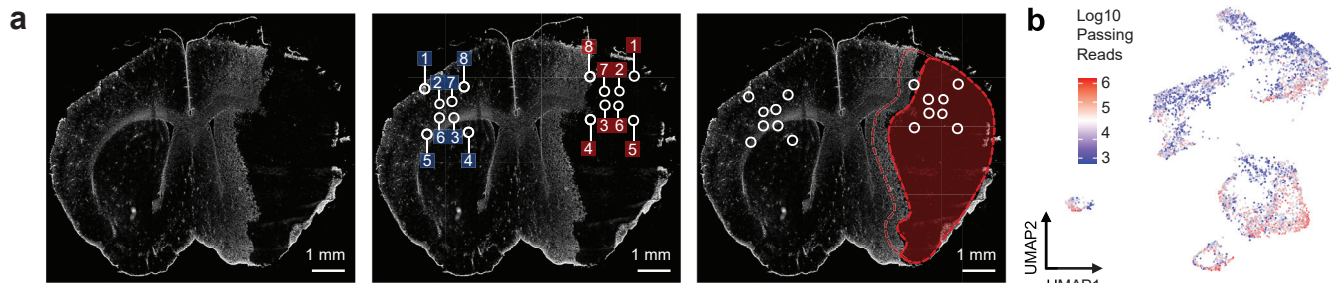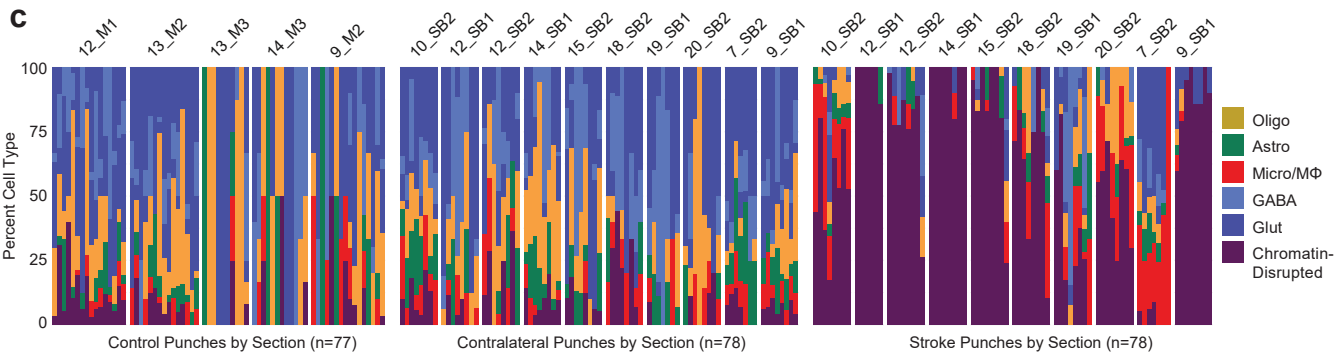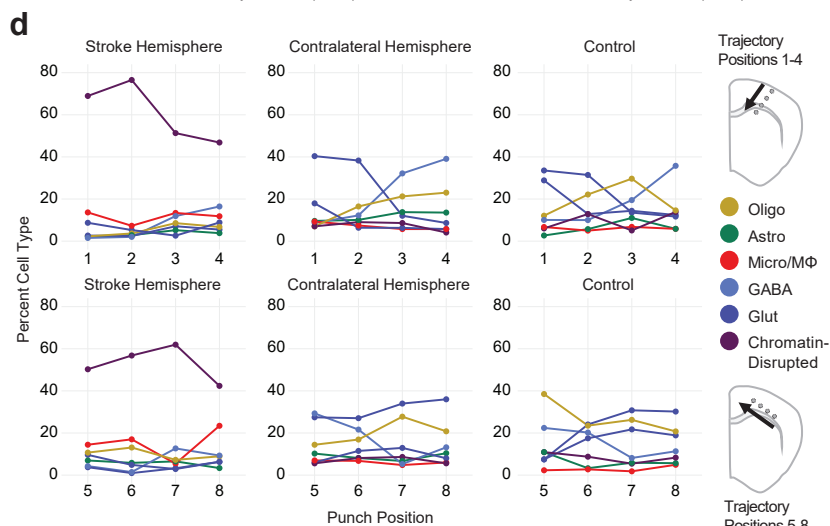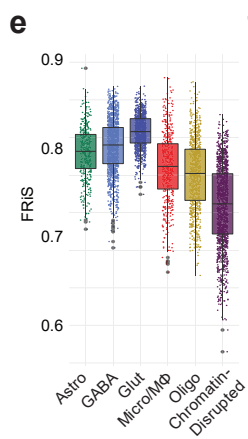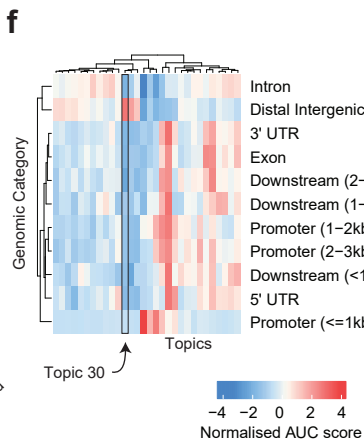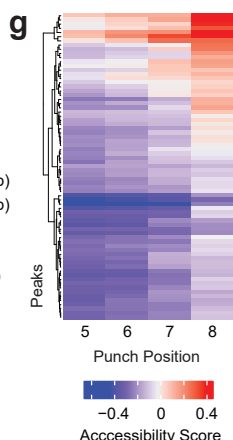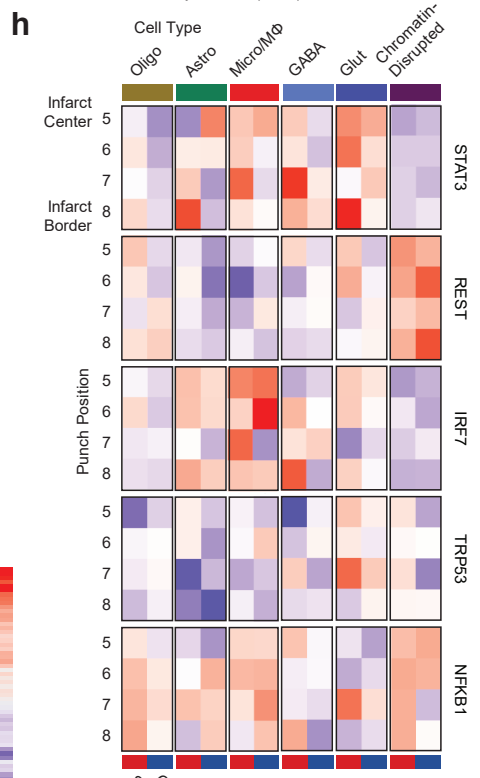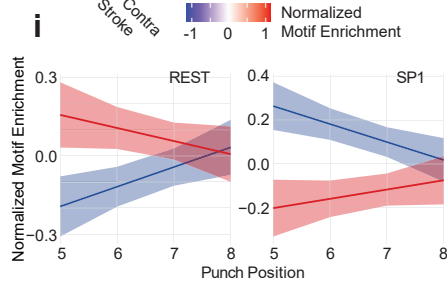

Source: http://biorxiv.org/content/10.1101/815720v2.full.pdf
